# Supplementary material for: SALpingectomy for STERilisation (SALSTER): study protocol for a Swedish multicentre register-based randomised controlled trial
Source: PubMed Central journal article supplement (PMC10481827; doi:10.1136/bmjopen-2022-071246), 2023-09-04
Supplement: bmjopen-2022-071246.draft_revisions.pdf [file bmjopen-2022-071246.draft_revisions.pdf]

# BMJ Open

BMJ Open is committed to open peer review. As part of this commitment we make the peer review history of every article we publish publicly available.

When an article is published we post the peer reviewers' comments and the authors' responses online. We also post the versions of the paper that were used during peer review. These are the versions that the peer review comments apply to.

The versions of the paper that follow are the versions that were submitted during the peer review process. They are not the versions of record or the final published versions. They should not be cited or distributed as the published version of this manuscript.

BMJ Open is an open access journal and the full, final, typeset and author-corrected version of record of the manuscript is available on our site with no access controls, subscription charges or pay-per-view fees (<http://bmjopen.bmj.com>).

If you have any questions on BMJ Open's open peer review process please email [info.bmjopen@bmj.com](mailto:info.bmjopen@bmj.com)

# BMJ Open

## SALpingectomy for STERilisation (SALSTER); Study protocol for a Swedish multicentre register-based randomised controlled trial.

|                               |                                                                                                                                                                                                                                                                                                                                                                                                                                                                                                                                                                                  |
|-------------------------------|----------------------------------------------------------------------------------------------------------------------------------------------------------------------------------------------------------------------------------------------------------------------------------------------------------------------------------------------------------------------------------------------------------------------------------------------------------------------------------------------------------------------------------------------------------------------------------|
| Journal:                      | <i>BMJ Open</i>                                                                                                                                                                                                                                                                                                                                                                                                                                                                                                                                                                  |
| Manuscript ID                 | bmjopen-2022-071246                                                                                                                                                                                                                                                                                                                                                                                                                                                                                                                                                              |
| Article Type:                 | Protocol                                                                                                                                                                                                                                                                                                                                                                                                                                                                                                                                                                         |
| Date Submitted by the Author: | 21-Dec-2022                                                                                                                                                                                                                                                                                                                                                                                                                                                                                                                                                                      |
| Complete List of Authors:     | Magarakis, Leonidas; University of Gothenburg, Department of Obstetrics and Gynecology<br>Idahl, Annika ; Umea Universitet,<br>Sundfeldt, Karin; University of Gothenburg, Department of Obstetrics and Gynecology; Sahlgrenska University Hospital, Department of Obstetrics and Gynecology<br>Liv, Per; Umeå University, Department of Public Health and Clinical Medicine, Section of Sustainable Health<br>Pålsson, Mathias; University of Gothenburg, Department of Obstetrics and Gynecology<br>Strandell, Annika; University of Gothenburg Institute of Clinical Sciences |
| Keywords:                     | Minimally invasive surgery < GYNAECOLOGY, Gynaecological oncology < GYNAECOLOGY, GYNAECOLOGY                                                                                                                                                                                                                                                                                                                                                                                                                                                                                     |
|                               |                                                                                                                                                                                                                                                                                                                                                                                                                                                                                                                                                                                  |

SCHOLARONE™  
Manuscripts

1  
2  
3 **SALpingectomy for STERilisation (SALSTER); Study protocol for a**  
4  
5  
6 **Swedish multicentre register-based randomised controlled trial.**  
7

8 Leonidas Magarakis<sup>a\*</sup>, Annika Idahl<sup>b</sup>, Karin Sundfeldt<sup>a,c</sup>, Per Liv<sup>d</sup>, Mathias  
9  
10  
11 Pålsson<sup>a</sup> and Annika Strandell<sup>a,c</sup>  
12  
13

14  
15  
16 <sup>a</sup> Department of Obstetrics and Gynecology, Institute of Clinical Sciences, Sahlgrenska  
17  
18 Academy, University of Gothenburg, Sweden.  
19

20  
21 <sup>b</sup> Department of Clinical Sciences, Obstetrics and Gynecology, Umeå University, Umeå,  
22  
23 Sweden.  
24

25  
26 <sup>c</sup> Department of Obstetrics and Gynecology, Sahlgrenska University Hospital, Gothenburg,  
27  
28 Sweden.  
29

30  
31 <sup>d</sup> Department of Public Health and Clinical Medicine, Umeå University, Umeå, Sweden.  
32

33 \*Corresponding author:

34 Leonidas Magarakis, Department of Obstetrics and Gynecology, Skåne University Hospital,  
35  
36 Jan Waldenströms gata 47, SUS, Malmö, Sweden.  
37

38  
39 email: [leonidas.magarakis@gu.se](mailto:leonidas.magarakis@gu.se), tel: +4640332541  
40  
41

42  
43  
44 Word count abstract: 250 (Limit 250)  
45

46 Word count manus: 3944 (Limit 4000)  
47  
48

49  
50  
51 Keywords: Sterilisation, Salpingectomy, Tubal ligation, Randomised controlled trial, Ovarian  
52  
53 cancer  
54  
55  
56  
57  
58  
59  
60

## Abstract

### Introduction

Salpingectomy is currently suggested as an alternative to tubal ligation for sterilisation. Precursor lesions of ovarian carcinoma can be found in the Fallopian tubes; thus, salpingectomy could possibly reduce the incidence. Most of the existing trials on safety are small, on caesarean section and report on surrogate ovarian function measures. Randomised trials in laparoscopy are lacking. Well-designed trials are needed to evaluate safety of laparoscopic opportunistic salpingectomy.

### Methods and analysis

In SALSTER, a national register-based randomised controlled non-inferiority trial, women <50 years wishing laparoscopic sterilisation will be randomised to either salpingectomy or tubal ligation. The Swedish National Quality Register of Gynecological Surgery (GynOp) will be used for inclusion, randomisation, and follow-up. Primary outcomes are any complications up to eight weeks postoperatively, and age at menopause. Both outcomes are measured with questionnaires, complications are also assessed by a gynaecologist. In a nested trial, ovarian function will be evaluated comparing the mean difference of anti-Müllerian hormone, assessed preoperatively and one year after surgery.

### Ethics and dissemination

Performing salpingectomy for sterilisation has become increasingly common, despite the unclear risk-benefit balance. SALSTER studies the safety of salpingectomy compared with tubal ligation. Regardless of the result, SALSTER will provide gynaecologists with high quality evidence to inform women to decide on salpingectomy or not. The central ethical

1  
2  
3 review board of Gothenburg, Sweden (Dnr. 316-18) approved the trial in June 2018. Results  
4 will be presented at scientific congresses and published in peer reviewed scientific journals.  
5  
6  
7 The results will be communicated through professional organisations and research networks.  
8  
9

### 10 11 **Registration details**

12  
13 ClinicalTrials.gov, NCT03860805. Registered March 4<sup>th</sup>, 2019. Study protocol last updated  
14  
15 November 21<sup>st</sup>, 2021.  
16  
17

### 18 19 20 **Strengths and limitations of the study**

- 21  
22 • The register-based randomised controlled trial combines the advantages of two study  
23 designs: the randomised trial with unbiased allocation to minimise confounding and  
24 the observational register study with an automated and cost-efficient follow-up.  
25  
26
- 27 • Using the GynOp register as a platform allows all trial components (identification of  
28 eligible patients, communication regarding study information and giving informed  
29 consent, randomisation, and follow-up questionnaires) to be conducted within the  
30 register.  
31  
32
- 33 • The use of the Swedish personal identification number allows cross-linking of the  
34 study cohort with multiple registers for the long-term follow-up.  
35  
36
- 37 • The multicentre design enhances the generalisability of the results.  
38  
39
- 40 • The nature of the trial makes blinding of the patients very difficult and impossible for  
41 the surgeons.  
42  
43  
44  
45  
46  
47  
48  
49

### 50 51 52 **INTRODUCTION**

53  
54  
55  
56  
57 The use of salpingectomy as a sterilisation procedure is increasing, due to the theory of high-  
58 grade serous ovarian carcinoma (HGSC) originating from the Fallopian tube. Epithelial  
59  
60

1  
2  
3 ovarian cancer (EOC) is a group of heterogeneous malignancies regarding origin, molecular  
4 biology, morphology, gene expression, and clinical behaviour. Precancerous lesions, serous  
5 tubal intraepithelial carcinomas (STIC), detected in the tubal epithelium are suggested to be  
6 the origin of EOC, particularly HGSC. Dysplastic cells may shed from STIC lesions and  
7 implant on the ovaries and/or peritoneum and develop into HGSC.<sup>1</sup> Opportunistic  
8 salpingectomy to remove the potential site of origin as a preventive measure is therefore  
9 suggested for women who wish permanent sterilisation.<sup>2 3</sup>

10  
11  
12 Tubal ligation is by itself associated with some protection against EOC.<sup>4</sup> Fallopian tubes may  
13 act as a conduit of either malignant or normal cells from the endometrial cavity to the ovaries.  
14 These cells may give rise to endometrioid and clear-cell carcinomas directly or indirectly by  
15 malignant transformation of benign conditions such as endometriosis.<sup>5</sup> Possibly,  
16 salpingectomy could add to the protective effect of tubal ligation by removing the fimbriated  
17 end of the Fallopian tubes where STIC lesions may develop.<sup>4 6 7</sup>

18  
19  
20 Several gynaecological societies recommend physicians to inform women planned to undergo  
21 sterilisation, that bilateral salpingectomy instead of tubal ligation, is an option.<sup>2 3</sup> This  
22 recommendation is based on observational studies showing that *indicated* salpingectomy  
23 compared with no surgery, is associated with a decreased EOC incidence.<sup>4 6 7</sup> The effect size  
24 of *opportunistic* salpingectomy compared with tubal ligation is unknown.

25  
26  
27 There are safety concerns, since salpingectomy increases surgical trauma compared with  
28 tubal ligation. This may increase perioperative complications and may also affect blood and  
29 nerve supply to the ovaries, impairing ovarian function, and possibly, in the long term, cause  
30 an earlier menopause.<sup>8</sup> Systematic reviews comparing salpingectomy with tubal ligation for  
31  
32  
33  
34  
35  
36  
37  
38  
39  
40  
41  
42  
43  
44  
45  
46  
47  
48  
49  
50  
51  
52  
53  
54  
55  
56  
57  
58  
59  
60

1  
2  
3 safety outcomes such as reoperation, intraoperative complications, blood loss, wound  
4  
5 infections etc, have identified studies with various limitations.<sup>9</sup> All published randomised  
6  
7 controlled trials (RCTs) are small and conducted at caesarean section. They report on  
8  
9 surrogate measures of endocrine function and demonstrate no difference in the short term.<sup>10-12</sup>  
10  
11  
12 Many of the published cohort studies are small and underpowered to study complications.  
13  
14 Sterilisation is more commonly performed by laparoscopy, especially after the hysteroscopic  
15  
16 salpingeal occluding technique with permanent implants was withdrawn from the market due  
17  
18 to adverse effects.<sup>13</sup> No trial has reported on the outcome EOC. A large retrospective cohort  
19  
20 study detected no difference in time to menopausal symptoms when comparing women who  
21  
22 had undergone salpingectomy or tubal ligation. However, the follow-up period was  
23  
24 insufficiently short to analyse menopausal symptoms.<sup>14</sup> Well-designed randomised trials of  
25  
26 laparoscopic sterilisation procedures are needed to compare salpingectomy with tubal ligation  
27  
28 regarding both surgical outcomes and clinical endpoints of ovarian function.  
29  
30  
31  
32  
33  
34  
35  
36  
37  
38  
39  
40  
41  
42  
43  
44  
45  
46

35  
36 This register-based randomised trial will study the safety of laparoscopic salpingectomy for  
37  
38 sterilisation compared with tubal ligation. The specific aim is to analyse if the risk of  
39  
40 complications and hormonal side effects do not increase beyond pre-defined non-inferiority  
41  
42 margins after salpingectomy compared with tubal ligation.  
43  
44  
45  
46

## 47 **METHODS AND ANALYSIS**

### 48 49 50 51 **General study design**

52  
53 SALSTER, a national register-based, randomised controlled trial (R-RCT) will compare two  
54  
55 laparoscopic procedures for sterilisation: salpingectomy and tubal ligation. In the long term,  
56  
57 the EOC outcome will be pooled with data from the Hysterectomy and OPPortunistic  
58  
59  
60

1  
2  
3 SALpingectomy (HOPPSA) trial in an independent patient data (IPD) meta-analysis. The aim  
4  
5 is to demonstrate that opportunistic salpingectomy is superior to leaving the tubes *in situ* at  
6  
7 sterilisation or hysterectomy, regarding risk reduction of EOC.<sup>15</sup>  
8  
9

10  
11  
12 In the primary analyses, SALSTER will test the hypotheses that salpingectomy compared  
13  
14 with tubal ligation for laparoscopic sterilisation,  
15

- 16  
17 • does not increase the risk for complications perioperatively and up to eight weeks  
18  
19 postoperatively.
- 20  
21 • does not cause earlier menopause, assessed as age at onset of natural menopause.  
22  
23

### 24 25 26 **The GynOp register**

27  
28 The SALSTER trial is conducted within the Swedish National Quality Register of  
29  
30 Gynecological Surgery (GynOp).<sup>16</sup> GynOp is used by all gynaecological departments in  
31  
32 Sweden. Inclusion and participation in national quality registers in Sweden is regulated by  
33  
34 law<sup>17</sup>; patients are informed of their inclusion in the register, with an “opt-out” clause which,  
35  
36 if activated, enables the patient to have all his or her data removed from the register. The  
37  
38 GynOp database is approved for use by health-care systems under the supervision of the  
39  
40 Swedish Data Protection Authority. All information is stored on secured servers at Region  
41  
42 Västerbotten. Background health data, information on surgical procedures, diagnoses,  
43  
44 complications at eight weeks and one year postoperatively are routinely recorded in GynOp.  
45  
46 Women planned for gynaecologic surgery receive a personal password that allows them to  
47  
48 logon to GynOp to answer pre-operative and follow-up questionnaires. Data input in GynOp  
49  
50 is mainly web-based, but printouts of questionnaires can be used if needed. The data  
51  
52 collection forms and questionnaires are available from [www.gynop.org](http://www.gynop.org) on request.  
53  
54  
55  
56  
57  
58  
59  
60



1  
2  
3 All gynaecological departments reporting data to the register received information about the  
4 trial and were automatically included unless a department actively declined participation. A  
5  
6 list of gynaecological departments participating in the study can be provided by the GynOp  
7  
8 office in Umeå on demand. Both regional and academic gynaecological departments are  
9  
10 participating in the study. The Swedish network for National Clinical Studies in Obstetrics  
11  
12 and Gynecology (SNAKS) is actively involved and improves collaboration between health  
13  
14 care providers engaged in the trial.<sup>18</sup>  
15  
16  
17  
18  
19

20 A specific SALSTER application has been added to GynOp to complement existing routines.  
21  
22 This module includes screening of eligibility, presentation of study information and  
23  
24 opportunity to give informed consent on-line, as well as randomisation and trial-specific  
25  
26 questionnaires pre-operatively and for follow-up.  
27  
28  
29

30 Preoperatively, basic baseline demographic variables are registered routinely. Added to these  
31  
32 variables are questions on menstruation pattern, age at menarche, duration of breast feeding,  
33  
34 previous and present use of hormonal contraceptives and previous Chlamydia infection or  
35  
36 salpingitis to assess factors suggested to effect risk for EOC. Furthermore, the Menopause  
37  
38 Rating Scale (MRS)<sup>19</sup> was added.  
39  
40  
41  
42

43 MRS is a validated questionnaire available in several languages, including Swedish. It has 11  
44  
45 questions on sweating, heart discomfort, sleep problems, depressive mood, irritability,  
46  
47 anxiety, physical and mental exhaustion, sexual problems, bladder problems, vaginal dryness,  
48  
49 and joint and muscular function, to which patients respond in a five-grade Likert scale.<sup>20</sup>  
50  
51  
52

53 Perioperative variables in GynOp are type of anaesthesia, any pathological finding in the  
54  
55 abdomen, procedure(s) performed, complications, use of antibiotics, operative time, route of  
56  
57 specimen removal from the abdomen, blood loss, type of suturing and codes for surgery.  
58  
59  
60

1  
2  
3 SALSTER-specific questions concern total number and size of trocars used, method for tubal  
4 ligation, type of devices applied for salpingectomy and tubal ligation, specific questions on  
5 method of specimen extraction and need to suture the muscle fasciae following specimen  
6 evacuation.  
7  
8  
9  
10  
11  
12

13 GynOp automatically sends questionnaires to the patients electronically at eight weeks and  
14 one year postoperatively, to assess use of analgesics, bleeding, low urinary tract symptoms,  
15 sick leave, time to daily activities, satisfaction after surgery, complications and their  
16 treatment. If no answer is received, two reminders are sent automatically. Patient-reported  
17 complications are assessed and documented by a gynaecologist. Any complication is  
18 registered according to the Clavien-Dindo classification.<sup>21</sup> No amendments have been made  
19 to the eight-weeks questionnaire.  
20  
21  
22  
23  
24  
25  
26  
27  
28  
29

30 The one-year questionnaire holds questions relating to pain experience, oestrogen treatment,  
31 symptoms from vagina, bladder and rectum, sexual intercourse last three months, coitus pain,  
32 result and satisfaction after surgery, complications, treatment of complications, hospital care,  
33 and sick leave. The one-year follow-up questionnaire has been supplemented with trial-  
34 specific questions on oestrogen and/or progesterone hormonal treatments and their indication,  
35 MRS, menstruation pattern, unintended pregnancies and their outcomes, and smoking habits.  
36 If complications are reported, these are assessed by a gynaecologist. Two routine reminders  
37 are sent.  
38  
39  
40  
41  
42  
43  
44  
45  
46  
47  
48  
49

50 Routinely there is no further follow up from GynOp. For trial participants questionnaires are  
51 sent every other year until the age of 55. Questions relate to the use of menopausal hormone  
52 therapy (MHT) or oestrogen and/or progesterone hormonal treatments and their indication,  
53 MRS, bleeding pattern, smoking habits, and unintended pregnancies and their outcomes.  
54  
55  
56  
57  
58  
59  
60

## Eligibility

All patients planned for laparoscopic sterilisation are automatically screened for eligibility in the trial by the GynOp software. Potential trial participants can read on-line the SALSTER information and answer the specific study questions. Paper printouts are also available in which case a medical administrator registers the information in GynOp by using a login with a two-factor authentication system. Patients may also be informed about the trial at an out-patient clinic visit when the decision on sterilisation is taken. Informed consent can be given either on-line within GynOp or by signing a paper document at any time point before randomisation. The consent is kept safe according to established research routines. Inclusion and exclusion criteria are summarised in Table 1.

Table 1. Eligibility criteria for women participating in SALSTER

| <i>Inclusion criteria</i>                 | <i>Exclusion criteria</i>                                                                                                                                                                           |
|-------------------------------------------|-----------------------------------------------------------------------------------------------------------------------------------------------------------------------------------------------------|
| Scheduled for laparoscopic sterilisation. | 50 years or older.<br>Not able to understand oral and written study information.<br>Previously treated with either chemo-, radio- or hormonal therapy which may negatively affect ovarian function. |

## Randomisation and blinding

The randomisation module in GynOp randomly allocates women 1:1 to either salpingectomy or tubal ligation, stratified by age and centre. Timing of randomisation is as close as possible to the time of surgery. The randomisation is performed on-line by the examining/operating gynaecologist or assistant with an immediate allocation response.

The nature of the trial makes blinding of patients very difficult and impossible for surgeons. Our intention is to avoid revealing information about which type of surgery was performed and we ask trial participants not to read their on-line medical records. Blinding of patients is further aggravated as a detailed preoperative information is given including the number of

1  
2  
3 scars associated with each procedure. In general, tubal ligation requires only one accessory  
4  
5 port whereas salpingectomy requires at least two.  
6  
7  
8  
9

### 10 **Interventions**

11  
12 Both interventions are planned as laparoscopic procedures. If the allocated procedure cannot  
13  
14 be executed because of either unexpected pathology or high risk for serious intraoperative  
15  
16 complications, the surgical procedure that was eventually done will be registered in GynOp,  
17  
18 but the individual still contributes with follow-up data. The same applies if extra surgical  
19  
20 procedures are needed or in case of conversion to laparotomy where all surgical interventions  
21  
22 are registered.  
23  
24  
25  
26  
27

### 28 **Follow-up**

29  
30 Hospital staff routinely register data in GynOp at the end of every surgical procedure and at  
31  
32 discharge. In case of a complication the surgeon registers the event. Responsible surgeon  
33  
34 assesses the eight-weeks and one-year questionnaires and in suspicion of a complication or  
35  
36 unsatisfactory surgical results, a consultation is arranged. Any adverse effect is registered in  
37  
38 GynOp. If there is no response after two routine reminders a member of the steering group  
39  
40 contacts the department. In every department, a responsible physician will check responses  
41  
42 and completeness of questionnaires at different time points. In case of an adverse event, any  
43  
44 need for medical treatment to trial participants is covered by the Swedish health care system  
45  
46 according to the Swedish law.  
47  
48  
49  
50  
51  
52

### 53 **Outcomes**

54  
55  
56  
57  
58  
59  
60

The trial has two primary outcomes, one in the short- and one in the long-term. Secondary outcomes are registered in the short-, intermediate- and long-term. The primary and secondary outcomes are listed in Table 2.

Table 2. Outcomes in SALSTER

| <i>Time interval</i>                                  | <i>Primary outcomes</i>           | <i>Secondary outcomes</i>                                                                                                                                                                                                                                                                                                                            |
|-------------------------------------------------------|-----------------------------------|------------------------------------------------------------------------------------------------------------------------------------------------------------------------------------------------------------------------------------------------------------------------------------------------------------------------------------------------------|
| <i>Short term<br/>(up to 8 weeks)</i>                 | Any complication                  | Severe complications<br>Operative time<br>Perioperative blood loss.<br>Length of hospital stay                                                                                                                                                                                                                                                       |
| <i>Intermediate term<br/>(one year after surgery)</i> |                                   | Complications according to Clavien-Dindo<br>Complications according to the existing questions on complications in GynOp<br>Subsequent surgery on uterus, salpinges and/or ovaries<br>Pregnancy rate                                                                                                                                                  |
| <i>Long term</i>                                      | Age at onset of natural menopause | Age at the start of the perimenopausal state<br>Length of the perimenopausal state<br>Change in menopausal symptom score<br>Use of menopausal hormone therapy at any time during follow-up<br>Subsequent surgery on uterus, salpinges and/or ovaries<br>Pregnancy rate<br>Secondary expressions of oestrogen deficiency<br>Epithelial ovarian cancer |

*Any complication* up to eight weeks post-operatively, is retrieved directly from the GynOp database. The outcome includes any complication occurring per-operatively, diagnosed at postoperative emergency visits, or noted by the patient and assessed by the physician in the eight-weeks questionnaire. The complication is further categorised as mild or severe, by organ damaged, and is graded according to the Clavien-Dindo classification. These categorised variables will be analysed as secondary outcomes.

*Age at onset of natural menopause*, defined as twelve months of amenorrhea, is assessed by analysing reported bleeding pattern in the study-specific questionnaires sent every other year.

1  
2  
3 Women with MHT prescription, oestrogen and/or progesterone hormonal treatments, or a  
4 subsequent hysterectomy will not be included in this primary outcome, since they do not have  
5 a natural menopause.  
6  
7  
8  
9

10  
11  
12 The secondary short-term outcomes relate to the surgery and the in-hospital care as registered  
13 in GynOp. Secondary intermediate-term outcomes are retrieved from GynOp and other  
14 national quality and health registers. Secondary long-term outcomes such as length of and age  
15 at the start of perimenopausal state will be assessed by the trial-specific questionnaires  
16 describing bleeding pattern. Need for MHT will be assessed by every-other-year  
17 questionnaires and through The Drug Prescription Register up to 30 years after surgery.  
18  
19 Uterine and adnexal surgery that occurs after the primary surgery will be assessed through  
20 GynOp at one year and The Patient register lifelong after surgery. Unintended pregnancies  
21 and their outcomes will be registered through the trial-specific questionnaires. If intermediate  
22 term outcomes on ovarian function show a difference between groups, consequences of  
23 oestrogen deficiency, i.e., fractures related to osteoporosis and cardio-vascular events will be  
24 assessed through The Patient register. In the long-term, data from SALSTER will be pooled  
25 with data from the ongoing HOPPSA trial to analyse the incidence of epithelial ovarian  
26 cancer. Data will be retrieved through The Swedish Cancer Register, The Swedish Quality  
27 Register for Gynaecological Cancer, The Swedish Cause of Death Register and The Swedish  
28 Population Register and at lifelong follow-up.  
29  
30  
31  
32  
33  
34  
35  
36  
37  
38  
39  
40  
41  
42  
43  
44  
45  
46  
47  
48  
49  
50

### 51 **Data monitoring and data management**

52 Each surgical procedure in GynOp automatically receives a unique identification code  
53 number. This number is used in the trial to assign individual data, thus protecting  
54 confidentiality. The number of individuals randomised in the trial is continuously monitored  
55  
56  
57  
58  
59  
60

1  
2  
3 by the GynOp's administrators. Numbers of recruited and percentage of eligible women per  
4 participating clinic are reported every three months on the GynOp website and through the  
5  
6 participating clinic are reported every three months on the GynOp website and through the  
7  
8 SNAKS network which enhances communication between the research group and the  
9  
10 departments participating in the trial. Regular online meetings are being held updating  
11  
12 departments on the progress of the trial, and information is shared on recruiting performance.  
13  
14 An independent appointed Data Safety Monitoring Board has performed an interim analysis  
15  
16 when 50% of the target sample size was reached, according to the original plan, and gave  
17  
18 clearance for the study to continue recruiting patients.  
19  
20  
21  
22  
23

### 24 **Patient and public involvement**

25  
26 Women in reproductive age in the general population were involved at an early phase of the  
27  
28 planning, regarding choice of outcomes and development of the written study information. A  
29  
30 short explanation of the research question and the intended study protocol in lay language  
31  
32 with suggested outcomes were distributed among volunteers in waiting rooms at gynaecology  
33  
34 departments in Sweden. Open and specific questions were asked concerning the relevance of  
35  
36 the trial, the design, the outcomes, any missing issues, or missing outcomes. Questions  
37  
38 associated with the draft of the written study information related to readability, unnecessary  
39  
40 or missing information. Women were also asked to rate the importance of receiving  
41  
42 information about potential risks associated with opportunistic salpingectomy.  
43  
44  
45  
46  
47  
48

## 49 **STATISTICS**

### 50 51 52 53 **Sample size calculations**

54  
55  
56 Primary short-term outcome: *any complication* up to eight weeks  
57  
58  
59  
60

1  
2  
3 Complications to laparoscopic tubal ligation was registered in GynOp at a rate of 13.6% from  
4  
5 2010 to 2017. An increase of 3% is estimated after salpingectomy. If the non-inferiority  
6  
7 margin is defined as +10%, the upper limit of the two-sided 95% CI ( $\alpha=0.05$ ) for the  
8  
9 difference between the salpingectomy and the tubal ligation groups shall not be above the  
10  
11 +10% with a probability of 80% ( $\beta=20\%$ ). To demonstrate non-inferiority, 411 women per  
12  
13 randomisation group are needed (based on a two-sided Farrington-Manning test).<sup>22</sup> For  
14  
15 protection against a 10% loss to follow-up, the target sample was determined at 914. The  
16  
17 interim analysis revealed that 5% of randomised women interrupted their participation. For  
18  
19 protection against this loss, the target sample size was increased to 968.  
20  
21  
22  
23  
24  
25

26 Primary long-term outcome: *age at onset of menopause*

27  
28 Age at menopause on a Swedish population level was reported to be in mean 51.5 years and  
29  
30 SD was estimated at 3.0. A decrease of one year is estimated after salpingectomy. If the non-  
31  
32 inferiority margin is defined as two years, the upper limit of the two-sided 95% CI ( $\alpha=0.05$ )  
33  
34 for the difference between the salpingectomy group and the tubal ligation group shall not be  
35  
36 above two years with a probability of 80% ( $\beta=20\%$ ). To demonstrate non-inferiority, 143  
37  
38 women per randomisation group are needed (two-sided non-parametric permutation test for  
39  
40 comparison of two means). Considering exclusion of women without a natural menopause  
41  
42 (30%), 5% of randomised women interrupting participation before the eight-weeks  
43  
44 questionnaire, and 15% loss during the 20 years long follow-up, approximately 572 women  
45  
46 are needed for recruitment.  
47  
48  
49  
50  
51  
52  
53

#### 54 **Statistical plan**

55  
56 Both “intention to treat”, and “per protocol” analyses will be performed. For non-inferiority  
57  
58 design, the “per protocol” analysis will be the primary.  
59  
60



1  
2  
3  
4  
5  
6 *Any complication* will be presented as numbers along with percentages with 95% CI and the  
7  
8 *age at onset of menopause* will be presented as mean and standard deviations, as well as with  
9  
10 median and quartiles. The two primary analyses measure different outcomes at different time  
11  
12 points and will be published in separate articles. As they also test two different hypotheses,  
13  
14 we will refrain from adjusting the 5% significance level for multiplicity.  
15  
16

17  
18  
19 Analyses of the short-term outcome *any complication*

20  
21 Primary analysis: To account for the lack of independence introduced by the stratification of  
22  
23 the randomisation, we will estimate the difference in the complication risk between the two  
24  
25 randomised groups with a 95% CI using a generalised estimation equation (GEE) with  
26  
27 logistic link function, marginalised over centre, and adjusted for age. The 95% CI of the risk  
28  
29 difference will be estimated from the GEE-model using the delta method. The upper limit of  
30  
31 the 95% CI shall not exceed the non-inferiority margin of 10%. As a sensitivity analysis, the  
32  
33 unadjusted 95% CI for the difference in complications will be calculated according to  
34  
35 Ferrington-Manning.<sup>22</sup> Furthermore, unadjusted risk ratio (RR) and adjusted RR with 95% CI  
36  
37 will also be calculated in secondary analyses using a GEE Poisson model with robust  
38  
39 standard errors.  
40  
41  
42  
43  
44  
45  
46

47 Analyses of the long-term outcome *age at menopause*

48  
49 The primary analysis will be a mixed effect model with adjustment for age as fixed effect and  
50  
51 centre as random effect, from which a two-sided 95% CI for the mean difference will be  
52  
53 constructed. The upper limit of the 95% CI shall not exceed the non-inferiority margin of two  
54  
55 years for non-inferiority to be established. A sensitivity analysis without adjustment will be  
56  
57  
58  
59  
60

1  
2  
3 conducted by constructing a 95% CI for the mean difference using Fisher's non-parametric  
4 permutation test.  
5  
6  
7  
8  
9

10 Missing data on the primary outcomes will be replaced with multiple imputation using fully  
11 conditional specification in the main analysis. In addition, a complete case analysis will be  
12 conducted. If both analyses of the two primary outcomes demonstrate non-inferiority, a  
13 common conclusion on the safety of the intervention can be inferred. However, the long  
14 period between these analyses will entail separate conclusions on complications and age at  
15 menopause, in a temporal order.  
16  
17  
18  
19  
20  
21  
22  
23  
24  
25

26 For other unadjusted comparisons between the two randomised groups Fisher's non-  
27 parametric permutation test will be used for continuous variables, Mantel-Haenszel Chi<sup>2</sup>-test  
28 for ordered categorical variables, Fisher's exact test for dichotomous variables and Chi<sup>2</sup>-test  
29 for non-ordered categorical variables. For dichotomous outcomes, a two-sided 95% CI for the  
30 difference in proportions between groups will be calculated as well as risk ratios with 95%  
31 CI. For continuous outcomes, two-sided 95% CIs for the difference in means between groups  
32 will be calculated. Also, adjusted analyses will be conducted.  
33  
34  
35  
36  
37  
38  
39  
40  
41  
42  
43  
44

45 All results from the secondary analysis will be given with estimates, 95% CI and two-sided p-  
46 values, as well as unadjusted and adjusted RR with 95% CI. The analyses of the secondary  
47 endpoints will be mainly explanatory.  
48  
49  
50  
51  
52  
53

54 A detailed statical analysis plan (SAP) will be written before data retrieval and published at  
55 the trial's site at ClinicalTrials.gov. Updates and changes in the planned statistical analyses  
56 will be published there.  
57  
58  
59  
60

## NESTED TRIAL OF ANTI-MÜLLERIAN HORMONE LEVELS

A biochemical measure of ovarian function is the serum level of AMH, a product of granulosa cells of the preantral and small antral follicles in the ovaries.<sup>23</sup> There is a theoretical rationale that salpingectomy may disturb the vascular and nervous supply to the ovary, or disrupt paracrine signalling, possibly causing impairment in ovarian function.<sup>8</sup> In the main trial, the primary outcome for ovarian function is based on clinical symptoms related to menopause. To strengthen the hypothesis of non-inferiority for ovarian function if salpingectomy is performed, an analysis of AMH is planned in a subset of patients.

Consecutive patients in SALSTER are asked for blood samples. Specific written and oral information is provided, and informed consent is signed. Blood samples are drawn at baseline and after one year. Seven hospitals are engaged in this nested trial. Samples are handled according to laboratory instructions, centrifugated, frozen within two days and stored in a biobank for later analysis, when the entire cohort will be analysed at the same time.

Results will be available after one year of follow-up and added manually to the GynOp dataset. Patients wishing to be informed about their AMH levels result will be contacted. AMH levels will be compared between the salpingectomy vs. tubal ligation groups and presented both in absolute and relative measures. Primary endpoint is absolute change in AMH from baseline to one year after surgery.

If non-inferiority is defined as 0.2 mg/L AMH, the upper limit of the two-sided 95% CI for the difference in change between the two groups shall not exceed 0.2 (SD for change 0.45)

1  
2  
3 with a probability of 80% ( $\beta=20\%$ ), and an estimation of up to 0.0 larger change (no  
4 difference in change) in the salpingectomy group, 81 patients per randomisation group is  
5  
6 needed to show non-inferiority. Estimating a 20% loss to follow-up (a second blood sample  
7 not taken), 204 patients will be recruited in this nested trial. A two-sided 95% CI for the  
8 mean difference in absolute change in AMH will be constructed using a mixed effect model  
9  
10 with adjustment for age as fixed effect and centre as random effect. Fisher's non-parametric  
11 permutation test will be applied for the unadjusted analysis.  
12  
13  
14  
15  
16  
17  
18  
19  
20

## 21 **ETHICS AND DISSEMINATION**

22  
23  
24  
25  
26 Even though EOC is not the most common gynaecological cancer it carries the worst  
27 prognosis due to early spread and vague symptomatology, making diagnosis difficult at an  
28 early stage. Based on the theory that the most common and aggressive form, HGSC may arise  
29 from the epithelium of the Fallopian tubes, the practice of opportunistic salpingectomy has  
30 rapidly gained popularity. Well-designed trials have not been performed to study the safety  
31 profile of salpingectomy compared with tubal ligation regarding complications and the effect  
32 on ovarian function. SALSTER will assess if salpingectomy is as safe as tubal ligation. The  
33 withdrawal of hysteroscopic sterilisation made the trial ethically reasonable to design since  
34 the less invasive hysteroscopic procedure for sterilisation was not available anymore.<sup>13</sup>  
35  
36  
37  
38  
39  
40  
41  
42  
43  
44  
45  
46  
47  
48  
49  
50  
51  
52  
53  
54  
55  
56  
57  
58  
59  
60  
61  
62  
63  
64  
65  
66  
67  
68  
69  
70  
71  
72  
73  
74  
75  
76  
77  
78  
79  
80  
81  
82  
83  
84  
85  
86  
87  
88  
89  
90  
91  
92  
93  
94  
95  
96  
97  
98  
99  
100

Regardless of the result, the trial will provide gynaecologists with high quality evidence to inform women, who can decide on having their tubes removed or not. If no additional risk is found, salpingectomy can be a recommended option. If not, the risks and benefits should be considered when counselling women wishing permanent surgical sterilisation.

1  
2  
3 SALSTER does not have EOC as a primary outcome for several reasons: There is a parallel  
4 trial, HOPPSA, which has EOC as a long-term primary outcome. At inclusion, the patients in  
5 HOPPSA are older than those in SALSTER, which implies a shorter time-to-event than in  
6 SALSTER. Also, hysterectomy is a more frequent procedure than sterilisation in Sweden,  
7 implying faster recruitment to the target sample size. Thus, the HOPPSA trial is more suited  
8 to investigate and conclude on EOC as a primary outcome. Furthermore, the plan for  
9 SALSTER is to contribute data to be pooled with HOPPSA data for the evaluation of the  
10 effect of opportunistic salpingectomy on EOC. A combined SAP will be written for an IPD  
11 meta-analysis combining HOPPSA and SALSTER.  
12  
13  
14  
15  
16  
17  
18  
19  
20  
21  
22  
23  
24

25 The results of this trial will be presented at national as well as international scientific  
26 congresses and several publications are planned in international scientific journals. All results  
27 will be presented on aggregated level, without any possibility to identify individuals. SNAKS  
28 will help to spread the results of this trial to its network of gynaecological departments in  
29 Sweden. Updates of results will be presented at the annual meetings of the Swedish Society  
30 of Obstetrics and Gynecology.  
31  
32  
33  
34  
35  
36  
37  
38  
39

40 The SALSTER trial was approved by the central ethical review board in Gothenburg, Sweden  
41 June 18<sup>th</sup>, 2018 (Dnr. 316-18). The first patient was randomised April 4<sup>th</sup>, 2019. The trial is  
42 recruiting, and 864 women had been randomised August 31<sup>st</sup>, 2022.  
43  
44  
45  
46  
47  
48

#### 49 **Authors' contribution**

50  
51 AS initiated the trial, designed, and drafted the first study protocol. AI engaged  
52 in the revision and editing of the protocol. AI and MP are the primary contact persons with  
53 the GynOp register. KS contributes with ovarian tumour biology experience. LM initiated the  
54 AMH nested trial. AS, AI, KS, MP, and LM approved the study protocol. AS applied to the  
55  
56  
57  
58  
59  
60

1  
2  
3 Swedish Ethical Review Authority. PL wrote the statistical plan. LM wrote the first draft of  
4  
5 this manuscript which was revised by AS, AI, KS, and MP. All committed authors approved  
6  
7 the final version of this manuscript.  
8  
9

10  
11  
12 Principal investigator: Annika Strandell, contact email: [annika.strandell@vgregion.se](mailto:annika.strandell@vgregion.se)  
13  
14

### 15 16 17 **Funding statement**

18  
19  
20  
21 This work was supported by the Swedish Cancer Society (21 1408 Pj), the Lena Wäppling  
22  
23 foundation, the Swedish state under the agreement between the Swedish government and the  
24  
25 county councils, the ALF-agreement (ALFGBG-965130 and ALF RegVB-969584), Umeå  
26  
27 University and Center for clinical research, county of Värmland grant number (LIVFOU-  
28  
29 929703). The funders were not involved in study design; collection, management, analysis,  
30  
31 and interpretation of data; writing of the report; and the decision to submit the report for  
32  
33 publication.  
34  
35  
36  
37  
38  
39

### 40 41 **Competing interest statement**

42  
43 None of the other authors have any conflicts of interest.  
44  
45  
46

### 47 48 **REFERENCES**

- 49  
50 1. Prat J. New insights into ovarian cancer pathology. *Annals of oncology : official journal of*  
51 *the European Society for Medical Oncology* 2012;23 Suppl 10:111-7. doi:  
52 <https://doi.org/10.1093/annonc/mds300>  
53 2. Salvador S, Scott S, Francis JA, et al. No. 344-Opportunistic Salpingectomy and Other  
54 Methods of Risk Reduction for Ovarian/Fallopian Tube/Peritoneal Cancer in the  
55 General Population. *Journal of obstetrics and gynaecology Canada : JOGC*  
56 2017;39(6) doi: <https://10.1016/j.jogc.2016.12.005>  
57 3. ACOG Committee Opinion No. 774: Opportunistic Salpingectomy as a Strategy for  
58 Epithelial Ovarian Cancer Prevention. *Obstetrics and gynecology* 2019;133(4) doi:  
59 <https://10.1097/AOG.0000000000003164>  
60

- 1
- 2
- 3
- 4 4. Madsen C, Baandrup L, Dehlendorff C, et al. Tubal ligation and salpingectomy and the  
5 risk of epithelial ovarian cancer and borderline ovarian tumors: a nationwide case-  
6 control study. *Acta obstetrica et gynecologica Scandinavica* 2015;94(1):86-94. doi:  
7 <https://doi.org/10.1111/aogs.12516>
- 8 5. Cochrane DR, Tessier-Cloutier B, Lawrence KM, et al. Clear cell and endometrioid  
9 carcinomas: are their differences attributable to distinct cells of origin? *The Journal of*  
10 *pathology* 2017;243(1) doi: <https://10.1002/path.4934>
- 11 6. Lessard-Anderson CR, Handlogten KS, Molitor RJ, et al. Effect of tubal sterilization  
12 technique on risk of serous epithelial ovarian and primary peritoneal carcinoma.  
13 *Gynecologic oncology* 2014;135(3) doi: <https://doi.org/10.1016/j.ygyno.2014.10.005>
- 14 7. Falconer H, Yin L, Grönberg H, et al. Ovarian cancer risk after salpingectomy: a  
15 nationwide population-based study. *Journal of the National Cancer Institute*  
16 2015;107(2):410. doi: <https://doi.org/10.1093/jnci/dju410>
- 17 8. Kotlyar A, Gingold J, Shue S, et al. The Effect of Salpingectomy on Ovarian Function.  
18 *Journal of minimally invasive gynecology* 2017;24(4) doi:  
19 <https://10.1016/j.jmig.2017.02.014>
- 20 9. Magarakis L, Idahl A, Särnqvist C, et al. Efficacy and safety of sterilisation procedures to  
21 reduce the risk of epithelial ovarian cancer: a systematic review comparing  
22 salpingectomy with tubal ligation. *The European journal of contraception &*  
23 *reproductive health care : the official journal of the European Society of*  
24 *Contraception* 2021 doi: <https://10.1080/13625187.2021.2010041>
- 25 10. Ganer Herman H, Gluck O, Keidar R, et al. Ovarian reserve following cesarean section  
26 with salpingectomy vs tubal ligation: a randomized trial. *American journal of*  
27 *obstetrics and gynecology* 2017;217(4):472.e1-72.e6. doi:  
28 <https://doi.org/10.1016/j.ajog.2017.04.028>
- 29 11. Garcia C, Moskowitz OM, Chisholm CA, et al. Salpingectomy Compared With Tubal  
30 Ligation at Cesarean Delivery: A Randomized Controlled Trial. *Obstetrics and*  
31 *gynecology* 2018;132(1):29-34. doi: <https://doi.org/10.1097/AOG.0000000000002674>
- 32 12. Subramaniam A, Blanchard CT, Erickson BK, et al. Feasibility of Complete  
33 Salpingectomy Compared With Standard Postpartum Tubal Ligation at Cesarean  
34 Delivery: A Randomized Controlled Trial. *Obstetrics and gynecology*  
35 2018;132(1):20-7. doi: <https://doi.org/10.1097/AOG.0000000000002646>
- 36 13. Problems Reported with Essure. Available from: [https://www.fda.gov/medical-](https://www.fda.gov/medical-devices/essure-permanent-birth-control/problems-reported-essure)  
37 [devices/essure-permanent-birth-control/problems-reported-essure](https://www.fda.gov/medical-devices/essure-permanent-birth-control/problems-reported-essure) [Accessed 11th  
38 November 2022].
- 39 14. Hanley GE, Kwon JS, McAlpine JN, et al. Examining indicators of early menopause  
40 following opportunistic salpingectomy: a cohort study from British Columbia,  
41 Canada. *American journal of obstetrics and gynecology* 2020;223(2):221.e21-21.e11.  
42 doi: <https://doi.org/10.1016/j.ajog.2020.02.005>
- 43 15. Idahl A, Darelius A, Sundfeldt K, et al. Hysterectomy and opportunistic salpingectomy  
44 (HOPPSA): study protocol for a register-based randomized controlled trial. *Trials*  
45 2019;20(1) doi: <https://10.1186/s13063-018-3083-8>
- 46 16. The Swedish National Quality Register of Gynecological Surgery. Available from:  
47 <http://www2.gynop.se/home/> [Accessed 7th November 2022].
- 48 17. Swedish National Quality Registries. Available from:  
49 <https://www.kvalitetsregister.se/en/kvalitetsregister/omnationellakvalitetsregister.522>  
50 18.html [Accessed 7 November 2022].
- 51 18. Swedish network for national clinical studies in Obstetrics and Gynecology. Available  
52 from: <https://www.snaks.se> [Accessed 7th November 2022].
- 53
- 54
- 55
- 56
- 57
- 58
- 59
- 60

19. Heinemann K, Ruebig A, Potthoff P, et al. The Menopause Rating Scale (MRS) scale: a methodological review. *Health and quality of life outcomes* 2004;2 doi: <https://10.1186/1477-7525-2-45>
20. Menopause Rating Scale. Available from: [http://www.menopause-rating-scale.info/documents/MRS\\_English.pdf](http://www.menopause-rating-scale.info/documents/MRS_English.pdf) [Accessed 7th November 2022].
21. Dindo D, Demartines N, Clavien PA. Classification of surgical complications: a new proposal with evaluation in a cohort of 6336 patients and results of a survey. *Annals of surgery* 2004;240(2) doi: <https://10.1097/01.sla.0000133083.54934.ae>
22. Farrington CP, Manning G. Test statistics and sample size formulae for comparative binomial trials with null hypothesis of non-zero risk difference or non-unity relative risk. *Statistics in medicine* 1990;9(12) doi: <https://10.1002/sim.4780091208>
23. Vigier B, Picard JY, Tran D, et al. Production of anti-Müllerian hormone: another homology between Sertoli and granulosa cells. *Endocrinology* 1984;114(4) doi: <https://10.1210/endo-114-4-1315>



1 SPIRIT schedule of enrolment, interventions, and assessments in the SALSTER trial according to the SPIRIT guidelines

|                                                        | STUDY PERIOD                |            |                 |              |         |        |                                        |             |
|--------------------------------------------------------|-----------------------------|------------|-----------------|--------------|---------|--------|----------------------------------------|-------------|
|                                                        | Enrolment                   | Allocation | Post-allocation |              |         |        |                                        |             |
| TIMEPOINT**                                            | 0-30 days before allocation | 0          | Peri-operative  | At discharge | 8 weeks | 1 year | Every other year up to 55 years of age | 20-30 years |
| <b>ENROLMENT:</b>                                      |                             |            |                 |              |         |        |                                        |             |
| Eligibility screen                                     | X                           |            |                 |              |         |        |                                        |             |
| Informed consent                                       | X                           |            |                 |              |         |        |                                        |             |
| Health questionnaires                                  | X                           |            |                 |              |         |        |                                        |             |
| Factors that may affect the risk for EOC               | X                           |            |                 |              |         |        |                                        |             |
| MRS                                                    | X                           |            |                 |              |         |        |                                        |             |
| Allocation                                             |                             | X          |                 |              |         |        |                                        |             |
| <b>INTERVENTIONS:</b>                                  |                             |            |                 |              |         |        |                                        |             |
| Bilateral salpingectomy                                |                             |            | X               |              |         |        |                                        |             |
| Tubal ligation                                         |                             |            | X               |              |         |        |                                        |             |
| <b>ASSESSMENTS:</b>                                    |                             |            |                 |              |         |        |                                        |             |
| Baseline characteristics                               | X                           | X          |                 |              |         |        |                                        |             |
| Perioperative variables                                |                             |            | X               | X            |         |        |                                        |             |
| SALSTER specific operative variables                   |                             |            | X               | X            |         |        |                                        |             |
| Severe complications                                   |                             |            | X               | X            | X       | X      |                                        |             |
| Complications                                          |                             |            | X               | X            | X       | X      |                                        |             |
| Age at the start of perimenopausal state               |                             |            |                 |              |         |        | X                                      |             |
| Length of perimenopausal state                         |                             |            |                 |              |         |        | X                                      |             |
| Change in menopausal symptom score                     |                             |            |                 |              |         | X      | X                                      |             |
| Use of MHT                                             |                             |            |                 |              |         | X      | X                                      |             |
| Subsequent surgery on uterus, salpinges and/or ovaries |                             |            |                 |              |         | X      | X                                      |             |
| Pregnancy                                              |                             |            |                 |              |         | X      | X                                      |             |
| EOC                                                    |                             |            |                 |              |         |        |                                        | X           |
| Secondary expressions of estrogen deficiency           |                             |            |                 |              |         |        |                                        | X           |

2 Abbreviations: EOC= Epithelial Ovarian Cancer, MRS= Menopause rating scale, MHT= Menopausal Hormone Therapy, PBL= Perioperative Blood Loss, SALSTER= SALpingectomy for STERilisation.

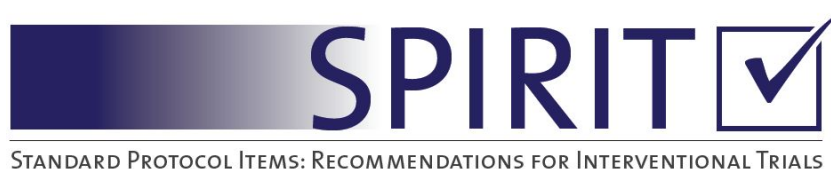

STANDARD PROTOCOL ITEMS: RECOMMENDATIONS FOR INTERVENTIONAL TRIALS

8 SPIRIT 2013 Checklist: Recommended items to address in a clinical trial protocol and related  
9 documents\*

| Section/item                      | Item No | Description                                                                                                                                                                                                                                                                              | Addressed on page number |
|-----------------------------------|---------|------------------------------------------------------------------------------------------------------------------------------------------------------------------------------------------------------------------------------------------------------------------------------------------|--------------------------|
| <b>Administrative information</b> |         |                                                                                                                                                                                                                                                                                          |                          |
| Title                             | 1       | Descriptive title identifying the study design, population, interventions, and, if applicable, trial acronym                                                                                                                                                                             | 1                        |
| Trial registration                | 2a      | Trial identifier and registry name. If not yet registered, name of intended registry                                                                                                                                                                                                     | 3                        |
|                                   | 2b      | All items from the World Health Organization Trial Registration Data Set                                                                                                                                                                                                                 | -                        |
| Protocol version                  | 3       | Date and version identifier                                                                                                                                                                                                                                                              | 3                        |
| Funding                           | 4       | Sources and types of financial, material, and other support                                                                                                                                                                                                                              | 21                       |
| Roles and responsibilities        | 5a      | Names, affiliations, and roles of protocol contributors                                                                                                                                                                                                                                  | 1, 20                    |
|                                   | 5b      | Name and contact information for the trial sponsor                                                                                                                                                                                                                                       | 20                       |
|                                   | 5c      | Role of study sponsor and funders, if any, in study design; collection, management, analysis, and interpretation of data; writing of the report; and the decision to submit the report for publication, including whether they will have ultimate authority over any of these activities | 21                       |
|                                   | 5d      | Composition, roles, and responsibilities of the coordinating centre, steering committee, endpoint adjudication committee, data management team, and other individuals or groups overseeing the trial, if applicable (see Item 21a for data monitoring committee)                         | -                        |
| <b>Introduction</b>               |         |                                                                                                                                                                                                                                                                                          |                          |
| Background and rationale          | 6a      | Description of research question and justification for undertaking the trial, including summary of relevant studies (published and unpublished) examining benefits and harms for each intervention                                                                                       | 3 - 5                    |
|                                   | 6b      | Explanation for choice of comparators                                                                                                                                                                                                                                                    | 3 - 5                    |
| Objectives                        | 7       | Specific objectives or hypotheses                                                                                                                                                                                                                                                        | 5                        |
| Trial design                      | 8       | Description of trial design including type of trial (eg, parallel group, crossover, factorial, single group), allocation ratio, and framework (eg, superiority, equivalence, noninferiority, exploratory)                                                                                | 5                        |

1

2 **Methods: Participants, interventions, and outcomes**

3

|    |                      |     |                                                                                                                                                                                                                                                                                                                                                                                |                   |
|----|----------------------|-----|--------------------------------------------------------------------------------------------------------------------------------------------------------------------------------------------------------------------------------------------------------------------------------------------------------------------------------------------------------------------------------|-------------------|
| 4  | Study setting        | 9   | Description of study settings (eg, community clinic, academic hospital) and list of countries where data will be collected. Reference to where list of study sites can be obtained                                                                                                                                                                                             | 5 - 6             |
| 5  |                      |     |                                                                                                                                                                                                                                                                                                                                                                                |                   |
| 6  |                      |     |                                                                                                                                                                                                                                                                                                                                                                                |                   |
| 7  |                      |     |                                                                                                                                                                                                                                                                                                                                                                                |                   |
| 8  | Eligibility criteria | 10  | Inclusion and exclusion criteria for participants. If applicable, eligibility criteria for study centres and individuals who will perform the interventions (eg, surgeons, psychotherapists)                                                                                                                                                                                   | 9, Table 1        |
| 9  |                      |     |                                                                                                                                                                                                                                                                                                                                                                                |                   |
| 10 |                      |     |                                                                                                                                                                                                                                                                                                                                                                                |                   |
| 11 |                      |     |                                                                                                                                                                                                                                                                                                                                                                                |                   |
| 12 |                      |     |                                                                                                                                                                                                                                                                                                                                                                                |                   |
| 13 | Interventions        | 11a | Interventions for each group with sufficient detail to allow replication, including how and when they will be administered                                                                                                                                                                                                                                                     | 9 - 10            |
| 14 |                      |     |                                                                                                                                                                                                                                                                                                                                                                                |                   |
| 15 |                      |     |                                                                                                                                                                                                                                                                                                                                                                                |                   |
| 16 |                      | 11b | Criteria for discontinuing or modifying allocated interventions for a given trial participant (eg, drug dose change in response to harms, participant request, or improving/worsening disease)                                                                                                                                                                                 | 10                |
| 17 |                      |     |                                                                                                                                                                                                                                                                                                                                                                                |                   |
| 18 |                      |     |                                                                                                                                                                                                                                                                                                                                                                                |                   |
| 19 |                      |     |                                                                                                                                                                                                                                                                                                                                                                                |                   |
| 20 |                      |     |                                                                                                                                                                                                                                                                                                                                                                                |                   |
| 21 |                      | 11c | Strategies to improve adherence to intervention protocols, and any procedures for monitoring adherence (eg, drug tablet return, laboratory tests)                                                                                                                                                                                                                              | 6 - 8             |
| 22 |                      |     |                                                                                                                                                                                                                                                                                                                                                                                |                   |
| 23 |                      |     |                                                                                                                                                                                                                                                                                                                                                                                |                   |
| 24 |                      |     |                                                                                                                                                                                                                                                                                                                                                                                |                   |
| 25 |                      | 11d | Relevant concomitant care and interventions that are permitted or prohibited during the trial                                                                                                                                                                                                                                                                                  | 9                 |
| 26 |                      |     |                                                                                                                                                                                                                                                                                                                                                                                |                   |
| 27 |                      |     |                                                                                                                                                                                                                                                                                                                                                                                |                   |
| 28 | Outcomes             | 12  | Primary, secondary, and other outcomes, including the specific measurement variable (eg, systolic blood pressure), analysis metric (eg, change from baseline, final value, time to event), method of aggregation (eg, median, proportion), and time point for each outcome. Explanation of the clinical relevance of chosen efficacy and harm outcomes is strongly recommended | 10 - 11, Table 2  |
| 29 |                      |     |                                                                                                                                                                                                                                                                                                                                                                                |                   |
| 30 |                      |     |                                                                                                                                                                                                                                                                                                                                                                                |                   |
| 31 |                      |     |                                                                                                                                                                                                                                                                                                                                                                                |                   |
| 32 |                      |     |                                                                                                                                                                                                                                                                                                                                                                                |                   |
| 33 |                      |     |                                                                                                                                                                                                                                                                                                                                                                                |                   |
| 34 |                      |     |                                                                                                                                                                                                                                                                                                                                                                                |                   |
| 35 |                      |     |                                                                                                                                                                                                                                                                                                                                                                                |                   |
| 36 | Participant          | 13  | Time schedule of enrolment, interventions (including any run-ins and washouts), assessments, and visits for participants. A schematic diagram is highly recommended (see Figure)                                                                                                                                                                                               | 10 - 11, Figure 1 |
| 37 | timeline             |     |                                                                                                                                                                                                                                                                                                                                                                                |                   |
| 38 |                      |     |                                                                                                                                                                                                                                                                                                                                                                                |                   |
| 39 |                      |     |                                                                                                                                                                                                                                                                                                                                                                                |                   |
| 40 |                      |     |                                                                                                                                                                                                                                                                                                                                                                                |                   |
| 41 | Sample size          | 14  | Estimated number of participants needed to achieve study objectives and how it was determined, including clinical and statistical assumptions supporting any sample size calculations                                                                                                                                                                                          | 13-17             |
| 42 |                      |     |                                                                                                                                                                                                                                                                                                                                                                                |                   |
| 43 |                      |     |                                                                                                                                                                                                                                                                                                                                                                                |                   |
| 44 |                      |     |                                                                                                                                                                                                                                                                                                                                                                                |                   |
| 45 | Recruitment          | 15  | Strategies for achieving adequate participant enrolment to reach target sample size                                                                                                                                                                                                                                                                                            | 6-9               |
| 46 |                      |     |                                                                                                                                                                                                                                                                                                                                                                                |                   |
| 47 |                      |     |                                                                                                                                                                                                                                                                                                                                                                                |                   |

48 **Methods: Assignment of interventions (for controlled trials)**

49 Allocation:

|    |            |     |                                                                                                                                                                                                                                                                                                                                                          |   |
|----|------------|-----|----------------------------------------------------------------------------------------------------------------------------------------------------------------------------------------------------------------------------------------------------------------------------------------------------------------------------------------------------------|---|
| 50 |            |     |                                                                                                                                                                                                                                                                                                                                                          |   |
| 51 | Sequence   | 16a | Method of generating the allocation sequence (eg, computer-generated random numbers), and list of any factors for stratification. To reduce predictability of a random sequence, details of any planned restriction (eg, blocking) should be provided in a separate document that is unavailable to those who enrol participants or assign interventions | 9 |
| 52 | generation |     |                                                                                                                                                                                                                                                                                                                                                          |   |
| 53 |            |     |                                                                                                                                                                                                                                                                                                                                                          |   |
| 54 |            |     |                                                                                                                                                                                                                                                                                                                                                          |   |
| 55 |            |     |                                                                                                                                                                                                                                                                                                                                                          |   |
| 56 |            |     |                                                                                                                                                                                                                                                                                                                                                          |   |
| 57 |            |     |                                                                                                                                                                                                                                                                                                                                                          |   |
| 58 |            |     |                                                                                                                                                                                                                                                                                                                                                          |   |
| 59 |            |     |                                                                                                                                                                                                                                                                                                                                                          |   |
| 60 |            |     |                                                                                                                                                                                                                                                                                                                                                          |   |

|    |                                                           |     |                                                                         |         |
|----|-----------------------------------------------------------|-----|-------------------------------------------------------------------------|---------|
| 1  |                                                           |     |                                                                         |         |
| 2  | Allocation                                                | 16b | Mechanism of implementing the allocation sequence (eg, central          | 9       |
| 3  | concealment                                               |     | telephone; sequentially numbered, opaque, sealed envelopes),            |         |
| 4  | mechanism                                                 |     | describing any steps to conceal the sequence until interventions are    |         |
| 5  |                                                           |     | assigned                                                                |         |
| 6  |                                                           |     |                                                                         |         |
| 7  | Implementatio                                             | 16c | Who will generate the allocation sequence, who will enrol               | 9       |
| 8  | n                                                         |     | participants, and who will assign participants to interventions         |         |
| 9  |                                                           |     |                                                                         |         |
| 10 |                                                           |     |                                                                         |         |
| 11 | Blinding                                                  | 17a | Who will be blinded after assignment to interventions (eg, trial        | 3, 9    |
| 12 | (masking)                                                 |     | participants, care providers, outcome assessors, data analysts), and    |         |
| 13 |                                                           |     | how                                                                     |         |
| 14 |                                                           |     |                                                                         |         |
| 15 |                                                           | 17b | If blinded, circumstances under which unblinding is permissible, and    | 3, 9    |
| 16 |                                                           |     | procedure for revealing a participant's allocated intervention during   |         |
| 17 |                                                           |     | the trial                                                               |         |
| 18 |                                                           |     |                                                                         |         |
| 19 |                                                           |     |                                                                         |         |
| 20 | <b>Methods: Data collection, management, and analysis</b> |     |                                                                         |         |
| 21 |                                                           |     |                                                                         |         |
| 22 | Data collection                                           | 18a | Plans for assessment and collection of outcome, baseline, and other     | 6 - 8   |
| 23 | methods                                                   |     | trial data, including any related processes to promote data quality     |         |
| 24 |                                                           |     | (eg, duplicate measurements, training of assessors) and a               |         |
| 25 |                                                           |     | description of study instruments (eg, questionnaires, laboratory tests) |         |
| 26 |                                                           |     | along with their reliability and validity, if known. Reference to where |         |
| 27 |                                                           |     | data collection forms can be found, if not in the protocol              |         |
| 28 |                                                           |     |                                                                         |         |
| 29 |                                                           |     |                                                                         |         |
| 30 |                                                           | 18b | Plans to promote participant retention and complete follow-up,          | 6 - 12  |
| 31 |                                                           |     | including list of any outcome data to be collected for participants who |         |
| 32 |                                                           |     | discontinue or deviate from intervention protocols                      |         |
| 33 |                                                           |     |                                                                         |         |
| 34 | Data                                                      | 19  | Plans for data entry, coding, security, and storage, including any      | 6 - 12  |
| 35 | management                                                |     | related processes to promote data quality (eg, double data entry;       |         |
| 36 |                                                           |     | range checks for data values). Reference to where details of data       |         |
| 37 |                                                           |     | management procedures can be found, if not in the protocol              |         |
| 38 |                                                           |     |                                                                         |         |
| 39 |                                                           |     |                                                                         |         |
| 40 | Statistical                                               | 20a | Statistical methods for analysing primary and secondary outcomes.       | 13 - 17 |
| 41 | methods                                                   |     | Reference to where other details of the statistical analysis plan can   |         |
| 42 |                                                           |     | be found, if not in the protocol                                        |         |
| 43 |                                                           |     |                                                                         |         |
| 44 |                                                           | 20b | Methods for any additional analyses (eg, subgroup and adjusted          | 13 - 17 |
| 45 |                                                           |     | analyses)                                                               |         |
| 46 |                                                           |     |                                                                         |         |
| 47 |                                                           | 20c | Definition of analysis population relating to protocol non-adherence    | 13 - 17 |
| 48 |                                                           |     | (eg, as randomised analysis), and any statistical methods to handle     |         |
| 49 |                                                           |     | missing data (eg, multiple imputation)                                  |         |
| 50 |                                                           |     |                                                                         |         |
| 51 |                                                           |     |                                                                         |         |
| 52 | <b>Methods: Monitoring</b>                                |     |                                                                         |         |
| 53 |                                                           |     |                                                                         |         |
| 54 | Data monitoring                                           | 21a | Composition of data monitoring committee (DMC); summary of its          | 12      |
| 55 |                                                           |     | role and reporting structure; statement of whether it is independent    |         |
| 56 |                                                           |     | from the sponsor and competing interests; and reference to where        |         |
| 57 |                                                           |     | further details about its charter can be found, if not in the protocol. |         |
| 58 |                                                           |     | Alternatively, an explanation of why a DMC is not needed                |         |
| 59 |                                                           |     |                                                                         |         |
| 60 |                                                           |     |                                                                         |         |

|    |                                 |                                                                      |                                                                          |
|----|---------------------------------|----------------------------------------------------------------------|--------------------------------------------------------------------------|
| 1  |                                 |                                                                      |                                                                          |
| 2  | 21b                             | Description of any interim analyses and stopping guidelines,         | 12                                                                       |
| 3  |                                 | including who will have access to these interim results and make the |                                                                          |
| 4  |                                 | final decision to terminate the trial                                |                                                                          |
| 5  |                                 |                                                                      |                                                                          |
| 6  | Harms                           | 22                                                                   | Plans for collecting, assessing, reporting, and managing solicited and   |
| 7  |                                 |                                                                      | spontaneously reported adverse events and other unintended effects       |
| 8  |                                 |                                                                      | of trial interventions or trial conduct                                  |
| 9  |                                 |                                                                      |                                                                          |
| 10 |                                 |                                                                      |                                                                          |
| 11 | Auditing                        | 23                                                                   | Frequency and procedures for auditing trial conduct, if any, and         |
| 12 |                                 |                                                                      | whether the process will be independent from investigators and the       |
| 13 |                                 |                                                                      | sponsor                                                                  |
| 14 |                                 |                                                                      |                                                                          |
| 15 |                                 |                                                                      |                                                                          |
| 16 | <b>Ethics and dissemination</b> |                                                                      |                                                                          |
| 17 | Research ethics                 | 24                                                                   | Plans for seeking research ethics committee/institutional review         |
| 18 | approval                        |                                                                      | board (REC/IRB) approval                                                 |
| 19 |                                 |                                                                      |                                                                          |
| 20 |                                 |                                                                      |                                                                          |
| 21 | Protocol                        | 25                                                                   | Plans for communicating important protocol modifications (eg,            |
| 22 | amendments                      |                                                                      | changes to eligibility criteria, outcomes, analyses) to relevant parties |
| 23 |                                 |                                                                      | (eg, investigators, REC/IRBs, trial participants, trial registries,      |
| 24 |                                 |                                                                      | journals, regulators)                                                    |
| 25 |                                 |                                                                      |                                                                          |
| 26 | Consent or                      | 26a                                                                  | Who will obtain informed consent or assent from potential trial          |
| 27 | assent                          |                                                                      | participants or authorised surrogates, and how (see Item 32)             |
| 28 |                                 |                                                                      |                                                                          |
| 29 |                                 |                                                                      |                                                                          |
| 30 |                                 | 26b                                                                  | Additional consent provisions for collection and use of participant      |
| 31 |                                 |                                                                      | data and biological specimens in ancillary studies, if applicable        |
| 32 |                                 |                                                                      |                                                                          |
| 33 | Confidentiality                 | 27                                                                   | How personal information about potential and enrolled participants       |
| 34 |                                 |                                                                      | will be collected, shared, and maintained in order to protect            |
| 35 |                                 |                                                                      | confidentiality before, during, and after the trial                      |
| 36 |                                 |                                                                      |                                                                          |
| 37 | Declaration of                  | 28                                                                   | Financial and other competing interests for principal investigators for  |
| 38 | interests                       |                                                                      | the overall trial and each study site                                    |
| 39 |                                 |                                                                      |                                                                          |
| 40 | Access to data                  | 29                                                                   | Statement of who will have access to the final trial dataset, and        |
| 41 |                                 |                                                                      | disclosure of contractual agreements that limit such access for          |
| 42 |                                 |                                                                      | investigators                                                            |
| 43 |                                 |                                                                      |                                                                          |
| 44 |                                 |                                                                      |                                                                          |
| 45 | Ancillary and                   | 30                                                                   | Provisions, if any, for ancillary and post-trial care, and for           |
| 46 | post-trial care                 |                                                                      | compensation to those who suffer harm from trial participation           |
| 47 |                                 |                                                                      |                                                                          |
| 48 | Dissemination                   | 31a                                                                  | Plans for investigators and sponsor to communicate trial results to      |
| 49 | policy                          |                                                                      | participants, healthcare professionals, the public, and other relevant   |
| 50 |                                 |                                                                      | groups (eg, via publication, reporting in results databases, or other    |
| 51 |                                 |                                                                      | data sharing arrangements), including any publication restrictions       |
| 52 |                                 |                                                                      |                                                                          |
| 53 |                                 |                                                                      |                                                                          |
| 54 |                                 | 31b                                                                  | Authorship eligibility guidelines and any intended use of professional   |
| 55 |                                 |                                                                      | writers                                                                  |
| 56 |                                 |                                                                      |                                                                          |
| 57 |                                 | 31c                                                                  | Plans, if any, for granting public access to the full protocol,          |
| 58 |                                 |                                                                      | participant-level dataset, and statistical code                          |
| 59 |                                 |                                                                      |                                                                          |
| 60 |                                 |                                                                      |                                                                          |

1  
2 **Appendices**  
3

|                              |    |                                                                                                                                                                                                |       |
|------------------------------|----|------------------------------------------------------------------------------------------------------------------------------------------------------------------------------------------------|-------|
| 4 Informed consent materials | 32 | Model consent form and other related documentation given to participants and authorised surrogates                                                                                             | -     |
| 7 Biological specimens       | 33 | Plans for collection, laboratory evaluation, and storage of biological specimens for genetic or molecular analysis in the current trial and for future use in ancillary studies, if applicable | 16-17 |

11 It is strongly recommended that this checklist be read in conjunction with the SPIRIT 2013 Explanation  
12 & Elaboration for important clarification on the items. Amendments to the protocol should be tracked and  
13 dated. The SPIRIT checklist is copyrighted by the SPIRIT Group under the Creative Commons  
14 Attribution-NonCommercial-NoDerivs 3.0 Unported” license.  
15

16  
17  
18  
19  
20  
21  
22  
23  
24  
25  
26  
27  
28  
29  
30  
31  
32  
33  
34  
35  
36  
37  
38  
39  
40  
41  
42  
43  
44  
45  
46  
47  
48  
49  
50  
51  
52  
53  
54  
55  
56  
57  
58  
59  
60

For peer review only

# BMJ Open

## SALpingectomy for STERilisation (SALSTER); Study protocol for a Swedish multicentre register-based randomised controlled trial.

|                                 |                                                                                                                                                                                                                                                                                                                                                                                                                                                                                                                                                                                  |
|---------------------------------|----------------------------------------------------------------------------------------------------------------------------------------------------------------------------------------------------------------------------------------------------------------------------------------------------------------------------------------------------------------------------------------------------------------------------------------------------------------------------------------------------------------------------------------------------------------------------------|
| Journal:                        | <i>BMJ Open</i>                                                                                                                                                                                                                                                                                                                                                                                                                                                                                                                                                                  |
| Manuscript ID                   | bmjopen-2022-071246.R1                                                                                                                                                                                                                                                                                                                                                                                                                                                                                                                                                           |
| Article Type:                   | Protocol                                                                                                                                                                                                                                                                                                                                                                                                                                                                                                                                                                         |
| Date Submitted by the Author:   | 11-Jul-2023                                                                                                                                                                                                                                                                                                                                                                                                                                                                                                                                                                      |
| Complete List of Authors:       | Magarakis, Leonidas; University of Gothenburg, Department of Obstetrics and Gynecology<br>Idahl, Annika ; Umea Universitet,<br>Sundfeldt, Karin; University of Gothenburg, Department of Obstetrics and Gynecology; Sahlgrenska University Hospital, Department of Obstetrics and Gynecology<br>Liv, Per; Umeå University, Department of Public Health and Clinical Medicine, Section of Sustainable Health<br>Pålsson, Mathias; University of Gothenburg, Department of Obstetrics and Gynecology<br>Strandell, Annika; University of Gothenburg Institute of Clinical Sciences |
| <b>Primary Subject Heading</b>: | Obstetrics and gynaecology                                                                                                                                                                                                                                                                                                                                                                                                                                                                                                                                                       |
| Secondary Subject Heading:      | Obstetrics and gynaecology                                                                                                                                                                                                                                                                                                                                                                                                                                                                                                                                                       |
| Keywords:                       | Minimally invasive surgery < GYNAECOLOGY, Gynaecological oncology < GYNAECOLOGY, GYNAECOLOGY                                                                                                                                                                                                                                                                                                                                                                                                                                                                                     |
|                                 |                                                                                                                                                                                                                                                                                                                                                                                                                                                                                                                                                                                  |

SCHOLARONE™  
Manuscripts

1  
2  
3 **SALpingectomy for STERilisation (SALSTER); Study protocol for a**  
4  
5  
6 **Swedish multicentre register-based randomised controlled trial.**  
7

8 Leonidas Magarakis<sup>a\*</sup>, Annika Idahl<sup>b</sup>, Karin Sundfeldt<sup>a,c</sup>, Per Liv<sup>d</sup>, Mathias  
9  
10  
11 Pålsson<sup>a</sup> and Annika Strandell<sup>a,c</sup>  
12  
13

14  
15  
16 <sup>a</sup> Department of Obstetrics and Gynecology, Institute of Clinical Sciences, Sahlgrenska  
17  
18 Academy, University of Gothenburg, Sweden.  
19

20  
21 <sup>b</sup> Department of Clinical Sciences, Obstetrics and Gynecology, Umeå University, Umeå,  
22  
23 Sweden.  
24

25  
26 <sup>c</sup> Department of Obstetrics and Gynecology, Sahlgrenska University Hospital, Gothenburg,  
27  
28 Sweden.  
29

30  
31 <sup>d</sup> Department of Public Health and Clinical Medicine, Umeå University, Umeå, Sweden.  
32

33 \*Corresponding author:

34 Leonidas Magarakis, Department of Obstetrics and Gynecology, Skåne University Hospital,  
35  
36 Jan Waldenströms gata 47, SUS, Malmö, Sweden.  
37

38  
39 email: [leonidas.magarakis@gu.se](mailto:leonidas.magarakis@gu.se), tel: +4640332541  
40  
41

42  
43  
44 Word count abstract: 243 (Limit 250)  
45

46 Word count manus: 3982 (Limit 4000)  
47  
48

49  
50  
51 Keywords: Sterilisation, Salpingectomy, Tubal ligation, Tubal occlusion, Randomised  
52  
53 controlled trial, Ovarian cancer  
54  
55  
56  
57  
58  
59  
60



## Abstract

### Introduction

Salpingectomy is currently suggested as an alternative to tubal ligation for sterilisation. Precursor lesions of ovarian carcinoma can be found in the Fallopian tubes; thus, salpingectomy could possibly reduce the incidence. Most of the existing trials on safety are small, on caesarean section and report on surrogate ovarian function measures. Randomised trials in laparoscopy are lacking. Well-designed trials are needed to evaluate safety of laparoscopic opportunistic salpingectomy.

### Methods and analysis

In SALSTER, a national register-based randomised controlled non-inferiority trial, 968 women <50 years, wishing laparoscopic sterilisation will be randomised to either salpingectomy or tubal ligation. The Swedish National Quality Register of Gynecological Surgery (GynOp) will be used for inclusion, randomisation, and follow-up. Primary outcomes are *any complication* up to eight weeks postoperatively, and *age at menopause*. Both outcomes are measured with questionnaires, complications are also assessed by a gynaecologist. In a nested trial, ovarian function will be evaluated comparing the mean difference of anti-Müllerian hormone, assessed preoperatively and one year after surgery.

### Ethics and dissemination

Performing salpingectomy for sterilisation has become increasingly common, despite the unclear risk-benefit balance. SALSTER studies the safety of salpingectomy compared with tubal ligation. Regardless of the result, SALSTER will provide gynaecologists with high quality evidence to inform women to decide on salpingectomy or not. The central ethical

1  
2  
3 review board of Gothenburg, Sweden (Dnr. 316-18) approved the trial in 2018. Results will  
4 be presented at scientific congresses and published in peer reviewed scientific journals. The  
5 results will be communicated through professional organisations and research networks.  
6  
7  
8  
9  
10  
11

## 12 **Registration details**

13  
14 ClinicalTrials.gov, NCT03860805. Registered March 4<sup>th</sup>, 2019. Study protocol last updated  
15 July 7<sup>th</sup>, 2023  
16  
17  
18  
19  
20  
21

## 22 **Strengths and limitations of the study**

- 23  
24 • The register-based randomised controlled trial combines the advantages of two study  
25 designs: the randomised trial with unbiased allocation to minimise confounding and  
26 the observational register study with an automated and cost-efficient follow-up.  
27  
28
- 29 • Using the GynOp register as a platform allows all trial components (identification of  
30 eligible patients, communication regarding study information and giving informed  
31 consent, randomisation, and follow-up questionnaires) to be conducted within the  
32 register.  
33  
34
- 35 • The use of the Swedish personal identification number allows cross-linking of the  
36 study cohort with multiple registers for the long-term follow-up.  
37  
38
- 39 • The multicentre design enhances the generalisability of the results.  
40  
41
- 42 • The nature of the trial makes blinding of the patients very difficult and impossible for  
43 the surgeons.  
44  
45  
46  
47  
48  
49  
50  
51  
52  
53

## 54 **INTRODUCTION**

55  
56  
57  
58  
59  
60

1  
2  
3 The use of salpingectomy as a sterilisation procedure is increasing, due to the theory of high-  
4 grade serous ovarian carcinoma (HGSC) originating from the Fallopian tube. Epithelial  
5 ovarian cancer (EOC) is a group of heterogeneous malignancies regarding origin, molecular  
6 biology, morphology, gene expression, and clinical behaviour. Precancerous lesions, serous  
7 tubal intraepithelial carcinomas (STIC), detected in the tubal epithelium are suggested to be  
8 the origin of EOC, particularly HGSC. Dysplastic cells may shed from STIC lesions and  
9 implant on the ovaries and/or peritoneum and develop into HGSC.(1) Opportunistic  
10 salpingectomy to remove the potential site of origin as a preventive measure is therefore  
11 suggested for women who wish permanent sterilisation.(2,3)

12  
13  
14  
15  
16  
17  
18  
19  
20  
21  
22  
23  
24  
25  
26 Tubal ligation is by itself associated with some protection against EOC.(4) Fallopian tubes  
27 may act as a conduit of either malignant or normal cells from the endometrial cavity to the  
28 ovaries. These cells may give rise to endometrioid and clear-cell carcinomas directly or  
29 indirectly by malignant transformation of benign conditions such as endometriosis.(5)

30  
31  
32  
33  
34  
35 Possibly, salpingectomy could add to the protective effect of tubal ligation by removing the  
36 fimbriated end of the Fallopian tubes where STIC lesions may develop.(4,6,7)

37  
38  
39  
40  
41  
42  
43  
44  
45  
46  
47  
48  
49  
50  
51  
52  
53  
54  
55  
56  
57  
58  
59  
60  
Several gynaecological societies recommend physicians to inform women planned to undergo  
sterilisation, that bilateral salpingectomy instead of tubal ligation, is an option.(2,3) This  
recommendation is based on observational studies showing that *indicated* salpingectomy  
compared with no surgery, is associated with a decreased EOC incidence.(4,6,7) The effect  
size of *opportunistic* salpingectomy compared with tubal ligation is unknown.

There are safety concerns, since salpingectomy increases surgical trauma compared with  
tubal ligation. This may increase perioperative complications and may also affect blood and

1  
2  
3 nerve supply to the ovaries, impairing ovarian function, and possibly, in the long term, cause  
4 an earlier menopause.(8) Systematic reviews comparing salpingectomy with tubal ligation for  
5 safety outcomes such as reoperation, intraoperative complications, blood loss, wound  
6 infections etc, have identified studies with various limitations.(9) All published randomised  
7 controlled trials (RCTs) are small and conducted at caesarean section. They report on  
8 surrogate measures of endocrine function and demonstrate no difference in the short  
9 term.(10-12) Many of the published cohort studies are small and underpowered to study  
10 complications. Sterilisation is more commonly performed by laparoscopy, especially after the  
11 hysteroscopic salpingeal occluding technique with permanent implants was withdrawn from  
12 the market due to adverse effects.(13) No trial has reported on the outcome EOC. A large  
13 retrospective cohort study detected no difference in time to menopausal symptoms when  
14 comparing women who had undergone salpingectomy or tubal ligation. However, the follow-  
15 up period was insufficiently short to analyse menopausal symptoms.(14) Well-designed  
16 randomised trials of laparoscopic sterilisation procedures are needed to compare  
17 salpingectomy with tubal ligation regarding both surgical outcomes and clinical endpoints of  
18 ovarian function.

19  
20  
21  
22  
23  
24  
25  
26  
27  
28  
29  
30  
31  
32  
33  
34  
35  
36  
37  
38  
39  
40  
41  
42 This register-based randomised trial will study the safety of laparoscopic salpingectomy for  
43 sterilisation compared with tubal ligation. The specific aim is to analyse if the risk of  
44 complications and hormonal side effects do not increase beyond pre-defined non-inferiority  
45 margins after salpingectomy compared with tubal ligation.

## 46 47 48 49 50 51 52 53 **METHODS AND ANALYSIS**

### 54 55 56 57 58 **General study design**

1  
2  
3 SALSTER, a national register-based, randomised controlled trial (R-RCT) will compare two  
4  
5 laparoscopic procedures for sterilisation: salpingectomy and tubal ligation for safety aspects,  
6  
7 in women without known hereditary risk for EOC.  
8  
9

10  
11  
12 In the primary analyses, SALSTER will test the hypotheses that salpingectomy compared  
13  
14 with tubal ligation for laparoscopic sterilisation,  
15

- 16  
17 • does not increase the risk for complications perioperatively and up to eight weeks  
18  
19 postoperatively.  
20
- 21  
22 • does not cause earlier menopause, assessed as age at onset of natural menopause.  
23  
24

### 25 26 **The GynOp register**

27  
28 The SALSTER trial is conducted within the Swedish National Quality Register of  
29  
30 Gynecological Surgery (GynOp).<sup>(15)</sup> GynOp is used by all gynaecological departments in  
31  
32 Sweden. Inclusion and participation in national quality registers in Sweden is regulated by  
33  
34 law <sup>(16)</sup>; patients are informed of their inclusion in the register, with an “opt-out” clause  
35  
36 which, if activated, enables the patient to have all his or her data removed from the register.  
37  
38 The GynOp database is approved for use by health-care systems under the supervision of the  
39  
40 Swedish Data Protection Authority. All information is stored on secured servers at Region  
41  
42 Västerbotten. Background health data, information on surgical procedures, diagnoses,  
43  
44 complications at eight weeks and one year postoperatively are routinely recorded in GynOp.  
45  
46 Women planned for gynaecologic surgery receive a personal password that allows them to  
47  
48 logon to GynOp to answer pre-operative and follow-up questionnaires. Data input in GynOp  
49  
50 is mainly web-based, but printouts of questionnaires can be used if needed. The data  
51  
52 collection forms and questionnaires are available from [www.gynop.org](http://www.gynop.org) on request.  
53  
54  
55  
56  
57  
58  
59  
60

1  
2  
3 All gynaecological departments reporting data to the register received information about the  
4 trial and were automatically included unless a department actively declined participation. A  
5 list of gynaecological departments participating in the study can be provided by the GynOp  
6 office in Umeå on demand. Both regional and academic gynaecological departments are  
7 participating in the study. The Swedish network for National Clinical Studies in Obstetrics  
8 and Gynecology (SNAKS) is actively involved and improves collaboration between health  
9 care providers engaged in the trial.(17)

10  
11  
12 A specific SALSTER application has been added to GynOp to complement existing routines.  
13 This module includes screening of eligibility, presentation of study information and  
14 opportunity to give informed consent on-line, as well as randomisation and trial-specific  
15 questionnaires pre-operatively and for follow-up.

16  
17  
18 Preoperatively, basic baseline demographic variables are registered routinely. Added to these  
19 variables are questions on menstruation pattern, age at menarche, duration of breast feeding,  
20 previous and present use of hormonal contraceptives and previous Chlamydia infection or  
21 salpingitis to assess factors suggested to effect risk for EOC. Furthermore, the Menopause  
22 Rating Scale (MRS)(18) was added.

23  
24  
25 MRS is a validated questionnaire available in several languages, including Swedish. It has 11  
26 questions on sweating, heart discomfort, sleep problems, depressive mood, irritability,  
27 anxiety, physical and mental exhaustion, sexual problems, bladder problems, vaginal dryness,  
28 and joint and muscular function, to which patients respond in a five-grade Likert scale.(19)

29  
30  
31 Perioperative variables in GynOp are type of anaesthesia, any pathological finding in the  
32 abdomen, procedure(s) performed, complications, use of antibiotics, operative time, route of  
33 specimen removal from the abdomen, blood loss, type of suturing and codes for surgery.

1  
2  
3 SALSTER-specific questions concern total number and size of trocars used, method for tubal  
4 ligation, type of devices applied for salpingectomy and tubal ligation, specific questions on  
5 method of specimen extraction and need to suture the muscle fasciae following specimen  
6 evacuation.  
7  
8  
9  
10  
11  
12

13 GynOp automatically sends questionnaires to the patients electronically at eight weeks and  
14 one year postoperatively, to assess use of analgesics, bleeding, low urinary tract symptoms,  
15 sick leave, time to daily activities, satisfaction after surgery, complications and their  
16 treatment. If no answer is received, two digital reminders are sent automatically, and  
17 thereafter by ordinary mail. Patient-reported complications are assessed and documented by  
18 a gynaecologist. Any complication is registered according to the Clavien-Dindo  
19 classification.<sup>(20)</sup> No amendments have been made to the eight-weeks questionnaire.  
20  
21  
22  
23  
24  
25  
26  
27  
28  
29

30 The one-year questionnaire holds questions relating to pain experience, oestrogen treatment,  
31 symptoms from vagina, bladder and rectum, sexual intercourse last three months, coitus pain,  
32 result and satisfaction after surgery, complications, treatment of complications, hospital care,  
33 and sick leave. The questionnaire has been supplemented with trial-specific questions on  
34 oestrogen and/or progesterone hormonal treatments and their indication, MRS, menstruation  
35 pattern, unintended pregnancies and their outcomes, and smoking habits.  
36  
37  
38  
39  
40  
41  
42  
43  
44  
45

46 Routinely there is no further follow up from GynOp. For trial participants questionnaires are  
47 sent every other year until the age of 55. Questions relate to the use of menopausal hormone  
48 therapy (MHT) or oestrogen and/or progesterone hormonal treatments and their indication,  
49 MRS, bleeding pattern, smoking habits, and unintended pregnancies and their outcomes.  
50  
51  
52  
53  
54  
55

## 56 57 **Eligibility** 58 59 60

All patients planned for laparoscopic sterilisation are automatically screened for eligibility in the trial by the GynOp software. Patients with a known hereditary susceptibility for EOC such as BRCA mutations are not considered for tubal ligation and thus not for inclusion in SALSTER. Potential trial participants can read on-line the SALSTER information and answer the specific study questions. Paper printouts are also available in which case a medical administrator registers the information in GynOp by using a login with a two-factor authentication system. Patients may also be informed about the trial at an out-patient clinic visit when the decision on sterilisation is taken. Informed consent (Appendix 1) can be given, usually on-line within GynOp or by signing a paper document at any time point before randomisation. The consent is kept safe according to established research routines. Inclusion and exclusion criteria are summarised in Table 1.

Table 1. Eligibility criteria for women participating in SALSTER

| Inclusion criteria                                                     | Exclusion criteria                                                                                                                                                                                                         |
|------------------------------------------------------------------------|----------------------------------------------------------------------------------------------------------------------------------------------------------------------------------------------------------------------------|
| Scheduled for laparoscopic sterilisation.<br>Willing to be randomised. | Women older than 49 years.<br>Not able to understand oral and written study information.<br>Previously treated for malignancy with either chemo-, radio- or hormonal therapy which may negatively affect ovarian function. |

### Randomisation and blinding

The randomisation module in GynOp randomly allocates women in proportion 1:1 to either salpingectomy or tubal ligation using permuted blocks with random sizes of either two or four while stratified for centre. Timing of randomisation is as close as possible to the time of surgery. The randomisation is performed on-line by the examining/operating gynaecologist or assistant with an immediate allocation response.

The nature of the trial makes blinding of patients very difficult and impossible for surgeons. Our intention is to avoid revealing information about which type of surgery was performed and we ask trial participants not to read their on-line medical records. However, the right to



1  
2  
3 read medical records is regulated by law. Blinding of patients is further aggravated as a  
4  
5 detailed preoperative information is given including the number of scars associated with each  
6  
7 procedure. In general, tubal ligation requires only one accessory port whereas salpingectomy  
8  
9 requires at least two. Hence, blinding is not guaranteed.  
10  
11  
12  
13

### 14 **Interventions**

15  
16 Both interventions are planned as laparoscopic procedures. If the allocated procedure cannot  
17  
18 be executed because of either unexpected pathology or high risk for serious intraoperative  
19  
20 complications, the surgical procedure that was eventually performed will be registered in  
21  
22 GynOp, but the individual still contributes with follow-up data. The same applies if extra  
23  
24 surgical procedures are needed or in case of conversion to laparotomy where all surgical  
25  
26 interventions are registered.  
27  
28  
29  
30  
31  
32

### 33 **Follow-up**

34  
35 Hospital staff routinely register data in GynOp at the end of every surgical procedure and at  
36  
37 discharge. In case of a complication the surgeon registers the event. Responsible surgeon  
38  
39 assesses the eight-weeks and one-year questionnaires and in suspicion of a complication or  
40  
41 unsatisfactory surgical results, a consultation is arranged. Any adverse effect is registered in  
42  
43 GynOp. If there is no response reminders, a member of the steering group contacts the  
44  
45 department. In every department, a responsible physician will check responses and  
46  
47 completeness of questionnaires at different time points. In case of an adverse event, any need  
48  
49 for medical treatment to trial participants is covered by the Swedish health care system  
50  
51 according to the Swedish law.  
52  
53  
54  
55  
56  
57

### 58 **Outcomes**

The trial has two primary outcomes, one in the short- and one in the long-term. Secondary outcomes are registered in the short-, intermediate- and long-term (Table 2).

Table 2. Outcomes in SALSTER

| <b>Time interval</b>                                               | <b>Primary outcomes</b>           | <b>Secondary outcomes</b>                                                                                                                                                                                                                                                |
|--------------------------------------------------------------------|-----------------------------------|--------------------------------------------------------------------------------------------------------------------------------------------------------------------------------------------------------------------------------------------------------------------------|
| Short term<br>(up to 8 weeks)                                      | Any complication                  | Severe complications<br>Operative time<br>Perioperative blood loss.<br>Length of hospital stay                                                                                                                                                                           |
| Intermediate term<br>(one year after surgery)                      |                                   | Complications according to Clavien-Dindo<br>Complications according to the existing questions on complications in GynOp                                                                                                                                                  |
| Intermediate and long term                                         |                                   | Subsequent surgery on uterus, salpinges and/or ovaries<br>Pregnancy rate                                                                                                                                                                                                 |
| Long term<br>(more than one year and up to 30 years after surgery) | Age at onset of natural menopause | Age at the start of the perimenopausal state<br>Length of the perimenopausal state<br>Change in menopausal symptom score<br>Use of menopausal hormone therapy at any time during follow-up<br>Secondary expressions of oestrogen deficiency<br>Epithelial ovarian cancer |

*Any complication* up to eight weeks post-operatively, is retrieved directly from the GynOp database. The outcome includes any complication occurring per-operatively, diagnosed at postoperative emergency visits, or noted by the patient and assessed by the physician in the eight-weeks questionnaire. The complication is further categorised as mild or severe, by organ damaged, and is graded according to the Clavien-Dindo classification. These categorised variables will be analysed as secondary outcomes.

*Age at onset of natural menopause*, defined as twelve months of amenorrhea, is assessed by analysing reported bleeding pattern in the study-specific questionnaires sent every other year. Women with MHT prescription, oestrogen and/or progesterone hormonal treatments, or a

1  
2  
3 subsequent hysterectomy will not be included in this primary outcome, since they do not have  
4  
5 a natural menopause.  
6  
7  
8  
9

10 The secondary short-term outcomes relate to the surgery and the in-hospital care as registered  
11 in GynOp. Secondary intermediate-term outcomes are retrieved from GynOp and other  
12 national quality and health registers. Secondary long-term outcomes such as length of and age  
13 at the start of perimenopausal state will be assessed by the trial-specific questionnaires  
14 describing bleeding pattern. Need for MHT will be assessed by every-other-year  
15 questionnaires and through The Drug Prescription Register up to 30 years after surgery.  
16 Uterine and adnexal surgery that occurs after the primary surgery will be assessed through  
17 GynOp at one year and The Patient register lifelong after surgery. Unintended pregnancies  
18 and their outcomes will be registered through the trial-specific questionnaires. If outcomes on  
19 ovarian function show a difference between groups, consequences of oestrogen deficiency,  
20 i.e., fractures related to osteoporosis and cardio-vascular events will be assessed through The  
21 Patient register.  
22  
23  
24  
25  
26  
27  
28  
29  
30  
31  
32  
33  
34  
35  
36  
37  
38  
39

40 Ovarian cancer will be assessed by cross-linking SALSTER with Swedish national registers  
41 and pooled with data from the ongoing Hysterectomy and OPPortunistic Salpingectomy  
42 (HOPPSA) trial. HOPPSA is a Swedish multi-centre, register-based RCT where patients  
43 planned for hysterectomy are randomised to salpingectomy or no salpingectomy.(21) By  
44 pooling data from SALSTER and HOPPSA the effect size of opportunistic salpingectomy to  
45 reduce the incidence of epithelial ovarian cancer will be estimated. Data will be retrieved  
46 through The Swedish Cancer Register, The Swedish Quality Register for Gynaecological  
47 Cancer, The Swedish Cause of Death Register and The Swedish Population Register and at  
48 lifelong follow-up.  
49  
50  
51  
52  
53  
54  
55  
56  
57  
58  
59  
60

## **Data monitoring and data management**

Each surgical procedure in GynOp automatically receives a unique identification code number. This number is used in the trial to assign individual data, thus protecting confidentiality. The number of individuals randomised in the trial is continuously monitored by the GynOp's administrators. Numbers of recruited and percentage of eligible women per participating clinic are reported every three months on the GynOp website and through the SNAKS network which enhances communication between the research group and the departments participating in the trial. Regular online meetings are being held updating departments on the progress of the trial, and information is shared on recruiting performance. An independent appointed Data Safety Monitoring Board has performed an interim analysis when 50% of the target sample size was reached, according to the original plan, and gave clearance for the study to continue recruiting patients.

## **Patient and public involvement**

Women in reproductive age in the general population were involved at an early phase of the planning, regarding choice of outcomes and development of the written study information. A short explanation of the research question and the intended study protocol in lay language with suggested outcomes were distributed among volunteers in waiting rooms at gynaecology departments in Sweden. Open and specific questions were asked concerning the relevance of the trial, the design, the outcomes, any missing issues, or missing outcomes. Questions associated with the draft of the written study information related to readability, unnecessary or missing information. Women were also asked to rate the importance of receiving information about potential risks associated with opportunistic salpingectomy.

## STATISTICS

### Sample size calculations

Primary short-term outcome: *any complication* up to eight weeks

Complications to laparoscopic tubal ligation was registered in GynOp at a rate of 13.6% from 2010 to 2017. An increase of 3% is estimated after salpingectomy. If the non-inferiority margin is defined as +10%, the upper limit of the two-sided 95% CI ( $\alpha=0.05$ ) for the difference between the salpingectomy and the tubal ligation groups shall not be above the +10% with a probability of 80% ( $\beta=20\%$ ). To demonstrate non-inferiority, 411 women per randomisation group are needed (based on a two-sided Farrington-Manning test).<sup>22</sup> For protection against a 10% loss to follow-up, the target sample was determined at 914. The interim analysis revealed that 5% of randomised women interrupted their participation. For protection against this loss, the target sample size was increased to 968.

Primary long-term outcome: *age at onset of menopause*

Age at menopause on a Swedish population level was reported to be in mean 51.5 years and SD was estimated at 3.0. A decrease of one year is estimated after salpingectomy. If the non-inferiority margin is defined as two years, the upper limit of the two-sided 95% CI ( $\alpha=0.05$ ) for the difference between the salpingectomy group and the tubal ligation group shall not be above two years with a probability of 80% ( $\beta=20\%$ ). To demonstrate non-inferiority, 143 women per randomisation group are needed (two-sided non-parametric permutation test for comparison of two means). Considering exclusion of women without a natural menopause (30%), 5% of randomised women interrupting participation before the eight-weeks questionnaire, and 15% loss during the 20 years long follow-up, approximately 572 women are needed for recruitment.

## Statistical plan

Both “intention to treat”, and “per protocol” analyses will be performed. For non-inferiority design, the “per protocol” analysis will be the primary.

*Any complication* will be presented as numbers along with percentages with 95% CI and the *age at onset of menopause* will be presented as mean and standard deviations, as well as with median and quartiles. The two primary analyses measure different outcomes at different time points and will be published in separate articles. As they also test two different hypotheses, we will refrain from adjusting the 5% significance level for multiplicity.

### Analyses of *any complication up to eight weeks post-operatively*

Primary analysis: To account for the lack of independence introduced by the stratification of the randomisation, we will estimate the difference in the complication risk between the two randomised groups with a 95% CI using a generalised estimation equation (GEE) with logistic link function, marginalised over centre, and adjusted for age. The 95% CI of the risk difference will be estimated from the GEE-model using the delta method. The upper limit of the 95% CI shall not exceed the non-inferiority margin of 10%. As a sensitivity analysis, the unadjusted 95% CI for the difference in complications will be calculated according to Ferrington-Manning.<sup>(22)</sup> Furthermore, unadjusted risk ratio (RR) and adjusted RR with 95% CI will also be calculated in secondary analyses using a GEE Poisson model with robust standard errors.

### Analyses of *age at menopause*

1  
2  
3 The primary analysis will be a mixed effect model with adjustment for age as fixed effect and  
4 centre as random effect, from which a two-sided 95% CI for the mean difference will be  
5  
6 constructed. The upper limit of the 95% CI shall not exceed the non-inferiority margin of two  
7  
8 years for non-inferiority to be established. A sensitivity analysis without adjustment will be  
9  
10 conducted by constructing a 95% CI for the mean difference using Fisher's non-parametric  
11  
12 permutation test.  
13  
14  
15  
16  
17  
18

19 Missing data on the primary outcomes will be replaced with multiple imputation using fully  
20  
21 conditional specification in the main analysis. In addition, a complete case analysis will be  
22  
23 conducted. If both analyses of the two primary outcomes demonstrate non-inferiority, a  
24  
25 common conclusion on the safety of the intervention can be inferred. However, the long  
26  
27 period between these analyses will entail separate conclusions on complications and age at  
28  
29 menopause, in a temporal order.  
30  
31  
32  
33  
34

35 For other unadjusted comparisons between the two randomised groups Fisher's non-  
36  
37 parametric permutation test will be used for continuous variables, Mantel-Haenszel Chi<sup>2</sup>-test  
38  
39 for ordered categorical variables, Fisher's exact test for dichotomous variables and Chi<sup>2</sup>-test  
40  
41 for non-ordered categorical variables. For dichotomous outcomes, a two-sided 95% CI for the  
42  
43 difference in proportions between groups will be calculated as well as risk ratios with 95%  
44  
45 CI. For continuous outcomes, two-sided 95% CIs for the difference in means between groups  
46  
47 will be calculated. Also, adjusted analyses will be conducted.  
48  
49  
50  
51  
52

53 All results from the secondary analysis will be given with estimates, 95% CI and two-sided p-  
54  
55 values, as well as unadjusted and adjusted RR with 95% CI. The analyses of the secondary  
56  
57 endpoints will be mainly explanatory.  
58  
59  
60

1  
2  
3  
4  
5 A detailed statical analysis plan (SAP) will be written before data retrieval and published at  
6 the trial's site at ClinicalTrials.gov. Updates and changes in the planned statistical analyses  
7 will be published there.  
8  
9  
10  
11  
12  
13

#### 14 **NESTED TRIAL OF ANTI-MÜLLERIAN HORMONE LEVELS**

15  
16  
17  
18  
19 A biochemical measure of ovarian function is the serum level of AMH, a product  
20 of granulosa cells of the preantral and small antral follicles in the ovaries.(23) There is a  
21 theoretical rationale that salpingectomy may disturb the vascular and nervous supply to the  
22 ovary, or disrupt paracrine signalling, possibly causing impairment in ovarian function.(8) In  
23 the main trial, the primary outcome for ovarian function is based on clinical symptoms  
24 related to menopause. To strengthen the hypothesis of non-inferiority for ovarian function if  
25 salpingectomy is performed, an analysis of AMH is planned in a subset of patients.  
26  
27  
28  
29  
30  
31  
32  
33  
34  
35  
36  
37

38 Consecutive patients in SALSTER are asked for blood samples. Specific written and oral  
39 information is provided, and informed consent is signed. Blood samples are drawn at baseline  
40 and after one year. Seven hospitals are engaged in this nested trial. Samples are handled  
41 according to laboratory instructions, centrifugated, frozen within two days and stored in a  
42 biobank for later analysis, when the entire cohort will be analysed at the same time.  
43  
44  
45  
46  
47  
48  
49  
50

51 Results will be available after one year of follow-up and added manually to the GynOp  
52 dataset. Patients wishing to be informed about their AMH levels result will be contacted.  
53  
54 AMH levels will be compared between the salpingectomy vs. tubal ligation groups and  
55  
56  
57  
58  
59  
60



1  
2  
3 presented both in absolute and relative measures. Primary endpoint is absolute change in  
4  
5 AMH from baseline to one year after surgery.  
6  
7  
8  
9

10 If non-inferiority is defined as 0.2 mg/L AMH, the upper limit of the two-sided 95% CI for  
11  
12 the difference in change between the two groups shall not exceed 0.2 (SD for change 0.45)  
13  
14 with a probability of 80% ( $\beta=20\%$ ), and an estimation of up to 0.0 larger change (no  
15  
16 difference in change) in the salpingectomy group, 81 patients per randomisation group is  
17  
18 needed to show non-inferiority. Estimating a 20% loss to follow-up (a second blood sample  
19  
20 not taken), 204 patients will be recruited in this nested trial. A two-sided 95% CI for the  
21  
22 mean difference in absolute change in AMH will be constructed using a mixed effect model  
23  
24 with adjustment for age as fixed effect and centre as random effect. Fisher's non-parametric  
25  
26 permutation test will be applied for the unadjusted analysis.  
27  
28  
29  
30  
31  
32

### 33 **ETHICS AND DISSEMINATION**

34  
35  
36  
37

38 Even though EOC is not the most common gynaecological cancer it carries the worst  
39  
40 prognosis due to early spread and vague symptomatology, making diagnosis difficult at an  
41  
42 early stage. Based on the theory that the most common and aggressive form, HGSC may arise  
43  
44 from the epithelium of the Fallopian tubes, the practice of opportunistic salpingectomy has  
45  
46 rapidly gained popularity. Well-designed trials have not been performed to study the safety  
47  
48 profile of salpingectomy compared with tubal ligation regarding complications and the effect  
49  
50 on ovarian function. SALSTER will assess if salpingectomy is as safe as tubal ligation. The  
51  
52 withdrawal of hysteroscopic sterilisation made the trial ethically reasonable to design since  
53  
54 the less invasive hysteroscopic procedure for sterilisation was not available anymore.(13)  
55  
56  
57  
58 Regardless of the result, the trial will provide gynaecologists with high quality evidence to  
59  
60

1  
2  
3 inform women, who can decide on having their tubes removed or not. If no additional risk is  
4  
5 found, salpingectomy can be a recommended option. If not, the risks and benefits should be  
6  
7 considered when counselling women wishing permanent surgical sterilisation.  
8  
9

10  
11  
12 SALSTER does not have EOC as a primary outcome for several reasons: There is a parallel  
13  
14 trial, HOPPSA, which has EOC as a long-term primary outcome. At inclusion, the patients in  
15  
16 HOPPSA are older than those in SALSTER, which implies a shorter time-to-event than in  
17  
18 SALSTER. Also, hysterectomy is a more frequent procedure than sterilisation in Sweden,  
19  
20 implying faster recruitment to the target sample size. Thus, the HOPPSA trial is more suited  
21  
22 to investigate and conclude on EOC as a primary outcome. Furthermore, the plan for  
23  
24 SALSTER is to contribute data to be pooled with HOPPSA data for the evaluation of the  
25  
26 effect of opportunistic salpingectomy on EOC. A combined SAP will be written for an IPD  
27  
28 meta-analysis combining HOPPSA and SALSTER.  
29  
30  
31

32  
33  
34 The results of this trial will be presented at national as well as international scientific  
35  
36 congresses and several publications are planned in international scientific journals. All results  
37  
38 will be presented on aggregated level, without any possibility to identify individuals. SNAKS  
39  
40 will help to spread the results of this trial to its network of gynaecological departments in  
41  
42 Sweden. Updates of results will be presented at the annual meetings of the Swedish Society  
43  
44 of Obstetrics and Gynecology.  
45  
46  
47

48  
49 The SALSTER trial was approved by the central ethical review board in Gothenburg, Sweden  
50  
51 June 18<sup>th</sup>, 2018 (Dnr. 316-18). The first patient was randomised April 4<sup>th</sup>, 2019. The trial is  
52  
53 recruiting, and 864 women had been randomised August 31<sup>st</sup>, 2022.  
54  
55  
56

#### 57 58 **Authors' contribution** 59 60

1  
2  
3 AS initiated the trial, designed, and drafted the first study protocol. AI engaged  
4  
5 in the revision and editing of the protocol. AI and MP are the primary contact persons with  
6  
7 the GynOp register. KS contributes with ovarian tumour biology experience. LM initiated the  
8  
9 AMH nested trial. AS, AI, KS, MP, and LM approved the study protocol. AS applied to the  
10  
11 Swedish Ethical Review Authority. PL wrote the statistical plan. LM wrote the first draft of  
12  
13 this manuscript which was revised by AS, AI, KS, and MP. All committed authors approved  
14  
15 the final version of this manuscript.  
16  
17  
18  
19  
20

21  
22 Principal investigator: Annika Strandell, contact email: [annika.strandell@vgregion.se](mailto:annika.strandell@vgregion.se)  
23  
24  
25

### 26 **Funding statement**

27  
28 This work was supported by the Swedish Cancer Society (21 1408 Pj), the Lena Wäppling  
29  
30 foundation, the Swedish state under the agreement between the Swedish government and the  
31  
32 county councils, the ALF-agreement (ALFGBG-965130 and ALF RegVB-969584), Umeå  
33  
34 University and Center for clinical research, county of Värmland grant number (LIVFOU-  
35  
36 929703). The funders were not involved in study design; collection, management, analysis,  
37  
38 and interpretation of data; writing of the report; and the decision to submit the report for  
39  
40 publication.  
41  
42  
43  
44  
45  
46

### 47 **Competing interest statement**

48  
49 None of the other authors have any conflicts of interest.  
50  
51  
52

### 53 **REFERENCES**

- 54  
55  
56 1. Prat J. New insights into ovarian cancer pathology. *Annals of oncology : official journal of*  
57 *the European Society for Medical Oncology* 2012;23 Suppl 10:111-7. doi:  
58 <https://doi.org/10.1093/annonc/mds300>  
59  
60

- 1
  - 2
  - 3
  - 4
  - 5
  - 6
  - 7
  - 8
  - 9
  - 10
  - 11
  - 12
  - 13
  - 14
  - 15
  - 16
  - 17
  - 18
  - 19
  - 20
  - 21
  - 22
  - 23
  - 24
  - 25
  - 26
  - 27
  - 28
  - 29
  - 30
  - 31
  - 32
  - 33
  - 34
  - 35
  - 36
  - 37
  - 38
  - 39
  - 40
  - 41
  - 42
  - 43
  - 44
  - 45
  - 46
  - 47
  - 48
  - 49
  - 50
  - 51
  - 52
  - 53
  - 54
  - 55
  - 56
  - 57
  - 58
  - 59
  - 60
2. Salvador S, Scott S, Francis JA, et al. No. 344-Opportunistic Salpingectomy and Other Methods of Risk Reduction for Ovarian/Fallopian Tube/Peritoneal Cancer in the General Population. *Journal of obstetrics and gynaecology Canada : JOGC* 2017;39(6) doi: <https://10.1016/j.jogc.2016.12.005>
  3. ACOG Committee Opinion No. 774: Opportunistic Salpingectomy as a Strategy for Epithelial Ovarian Cancer Prevention. *Obstetrics and gynecology* 2019;133(4) doi: <https://10.1097/AOG.00000000000003164>
  4. Madsen C, Baandrup L, Dehlendorff C, et al. Tubal ligation and salpingectomy and the risk of epithelial ovarian cancer and borderline ovarian tumors: a nationwide case-control study. *Acta obstetrica et gynecologica Scandinavica* 2015;94(1):86-94. doi: <https://doi.org/10.1111/aogs.12516>
  5. Cochrane DR, Tessier-Cloutier B, Lawrence KM, et al. Clear cell and endometrioid carcinomas: are their differences attributable to distinct cells of origin? *The Journal of pathology* 2017;243(1) doi: <https://10.1002/path.4934>
  6. Lessard-Anderson CR, Handlogten KS, Molitor RJ, et al. Effect of tubal sterilization technique on risk of serous epithelial ovarian and primary peritoneal carcinoma. *Gynecologic oncology* 2014;135(3) doi: <https://doi.org/10.1016/j.ygyno.2014.10.005>
  7. Falconer H, Yin L, Grönberg H, et al. Ovarian cancer risk after salpingectomy: a nationwide population-based study. *Journal of the National Cancer Institute* 2015;107(2):410. doi: <https://doi.org/10.1093/jnci/dju410>
  8. Kotlyar A, Gingold J, Shue S, et al. The Effect of Salpingectomy on Ovarian Function. *Journal of minimally invasive gynecology* 2017;24(4) doi: <https://10.1016/j.jmig.2017.02.014>
  9. Magarakis L, Idahl A, Särnqvist C, et al. Efficacy and safety of sterilisation procedures to reduce the risk of epithelial ovarian cancer: a systematic review comparing salpingectomy with tubal ligation. *The European journal of contraception & reproductive health care : the official journal of the European Society of Contraception* 2021 doi: <https://10.1080/13625187.2021.2010041>
  10. Ganer Herman H, Gluck O, Keidar R, et al. Ovarian reserve following cesarean section with salpingectomy vs tubal ligation: a randomized trial. *American journal of obstetrics and gynecology* 2017;217(4):472.e1-72.e6. doi: <https://doi.org/10.1016/j.ajog.2017.04.028>
  11. Garcia C, Moskowitz OM, Chisholm CA, et al. Salpingectomy Compared With Tubal Ligation at Cesarean Delivery: A Randomized Controlled Trial. *Obstetrics and gynecology* 2018;132(1):29-34. doi: <https://doi.org/10.1097/AOG.0000000000002674>
  12. Subramaniam A, Blanchard CT, Erickson BK, et al. Feasibility of Complete Salpingectomy Compared With Standard Postpartum Tubal Ligation at Cesarean Delivery: A Randomized Controlled Trial. *Obstetrics and gynecology* 2018;132(1):20-7. doi: <https://doi.org/10.1097/AOG.0000000000002646>
  13. Problems Reported with Essure. Available from: <https://www.fda.gov/medical-devices/essure-permanent-birth-control/problems-reported-essure> [Accessed 11th November 2022].
  14. Hanley GE, Kwon JS, McAlpine JN, et al. Examining indicators of early menopause following opportunistic salpingectomy: a cohort study from British Columbia, Canada. *American journal of obstetrics and gynecology* 2020;223(2):221.e21-21.e11. doi: <https://doi.org/10.1016/j.ajog.2020.02.005>
  15. The Swedish National Quality Register of Gynecological Surgery. Available from: <http://www2.gynop.se/home/> [Accessed 7th November 2022].

16. Swedish National Quality Registries. Available from: <https://www.kvalitetsregister.se/en/kvalitetsregister/omnationellakvalitetsregister.52218.html> [Accessed 7 November 2022].
17. Swedish network for national clinical studies in Obstetrics and Gynecology. Available from: <https://www.snaks.se> [Accessed 7th November 2022].
18. Heinemann K, Ruebig A, Potthoff P, et al. The Menopause Rating Scale (MRS) scale: a methodological review. *Health and quality of life outcomes* 2004;2 doi: <https://10.1186/1477-7525-2-45>
19. Menopause Rating Scale. Available from: [http://www.menopause-rating-scale.info/documents/MRS\\_English.pdf](http://www.menopause-rating-scale.info/documents/MRS_English.pdf) [Accessed 7th November 2022].
20. Dindo D, Demartines N, Clavien PA. Classification of surgical complications: a new proposal with evaluation in a cohort of 6336 patients and results of a survey. *Annals of surgery* 2004;240(2) doi: <https://10.1097/01.sla.0000133083.54934.ae>
21. Idahl A, Darelus A, Sundfeldt K, et al. Hysterectomy and opportunistic salpingectomy (HOPPSA): study protocol for a register-based randomized controlled trial. *Trials* 2019;20(1) doi: <https://10.1186/s13063-018-3083-8>
22. Farrington CP, Manning G. Test statistics and sample size formulae for comparative binomial trials with null hypothesis of non-zero risk difference or non-unity relative risk. *Statistics in medicine* 1990;9(12) doi: <https://10.1002/sim.4780091208>
23. Vigier B, Picard JY, Tran D, et al. Production of anti-Müllerian hormone: another homology between Sertoli and granulosa cells. *Endocrinology* 1984;114(4) doi: <https://10.1210/endo-114-4-1315>

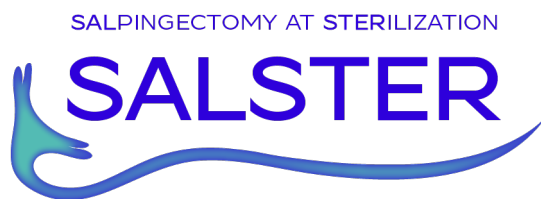

14 Consent to take part in the SALSTER study involves

- 15  
16 - confirming that you have received information about the study and have been given the  
17 opportunity to ask questions  
18  
19 - that you agree to participate in the study and that your personal data will be processed as  
20 described in the information  
21  
22 - that you are aware that your participation is completely voluntary and that you can cancel  
23 your participation without explanation, and without affecting your care and treatment in any  
24 future contacts with the health care system  
25  
26  
27

28 I agree to participate in the SALSTER study

- 29  
30  Yes, I do  
31  
32  No  
33  
34  
35  
36  Maybe, but I would like more information  
37  
38  
39

40 I agree to answer survey questions

- 41  
42  Yes  
43  
44  No  
45  
46  
47  
48  
49  
50  
51  
52  
53  
54  
55  
56  
57  
58  
59  
60

2018-09-07

1  
2  
3  
4  
5 This is the SALSTER Consent form as it appears in a print-out. It has been translated from  
6 Swedish with [www.DeepL.com/Translator](http://www.DeepL.com/Translator)  
7

8 Women log on to GynOp where they read this text and give consent on-line under the  
9 protection of a secured password.  
10  
11  
12  
13  
14  
15  
16  
17  
18  
19  
20  
21  
22  
23  
24  
25  
26  
27  
28  
29  
30  
31  
32  
33  
34  
35  
36  
37  
38  
39  
40  
41  
42  
43  
44  
45  
46  
47  
48  
49  
50  
51  
52  
53  
54  
55  
56  
57  
58  
59  
60

For peer review only

1 SPIRIT schedule of enrolment, interventions, and assessments in the SALSTER trial according to the SPIRIT guidelines

|                                                        | STUDY PERIOD                |            |                 |              |         |        |                                        |             |
|--------------------------------------------------------|-----------------------------|------------|-----------------|--------------|---------|--------|----------------------------------------|-------------|
|                                                        | Enrolment                   | Allocation | Post-allocation |              |         |        |                                        |             |
| TIMEPOINT**                                            | 0-30 days before allocation | 0          | Peri-operative  | At discharge | 8 weeks | 1 year | Every other year up to 55 years of age | 20-30 years |
| <b>ENROLMENT:</b>                                      |                             |            |                 |              |         |        |                                        |             |
| Eligibility screen                                     | X                           |            |                 |              |         |        |                                        |             |
| Informed consent                                       | X                           |            |                 |              |         |        |                                        |             |
| Health questionnaires                                  | X                           |            |                 |              |         |        |                                        |             |
| Factors that may affect the risk for EOC               | X                           |            |                 |              |         |        |                                        |             |
| MRS                                                    | X                           |            |                 |              |         |        |                                        |             |
| Allocation                                             |                             | X          |                 |              |         |        |                                        |             |
| <b>INTERVENTIONS:</b>                                  |                             |            |                 |              |         |        |                                        |             |
| Bilateral salpingectomy                                |                             |            | X               |              |         |        |                                        |             |
| Tubal ligation                                         |                             |            | X               |              |         |        |                                        |             |
| <b>ASSESSMENTS:</b>                                    |                             |            |                 |              |         |        |                                        |             |
| Baseline characteristics                               | X                           | X          |                 |              |         |        |                                        |             |
| Perioperative variables                                |                             |            | X               | X            |         |        |                                        |             |
| SALSTER specific operative variables                   |                             |            | X               | X            |         |        |                                        |             |
| Severe complications                                   |                             |            | X               | X            | X       | X      |                                        |             |
| Complications                                          |                             |            | X               | X            | X       | X      |                                        |             |
| Age at the start of perimenopausal state               |                             |            |                 |              |         |        | X                                      |             |
| Length of perimenopausal state                         |                             |            |                 |              |         |        | X                                      |             |
| Change in menopausal symptom score                     |                             |            |                 |              |         | X      | X                                      |             |
| Use of MHT                                             |                             |            |                 |              |         | X      | X                                      |             |
| Subsequent surgery on uterus, salpinges and/or ovaries |                             |            |                 |              |         | X      | X                                      |             |
| Pregnancy                                              |                             |            |                 |              |         | X      | X                                      |             |
| EOC                                                    |                             |            |                 |              |         |        |                                        | X           |
| Secondary expressions of estrogen deficiency           |                             |            |                 |              |         |        |                                        | X           |

2 Abbreviations: EOC= Epithelial Ovarian Cancer, MRS= Menopause rating scale, MHT= Menopausal Hormone Therapy, PBL= Perioperative Blood Loss, SALSTER= SALpingectomy for STERilisation.



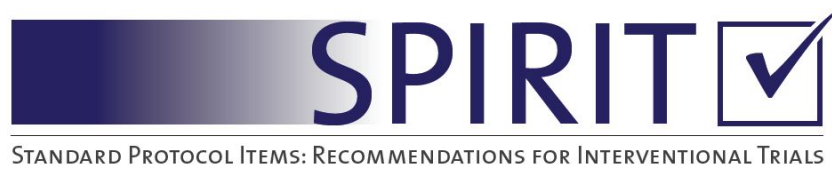

STANDARD PROTOCOL ITEMS: RECOMMENDATIONS FOR INTERVENTIONAL TRIALS

1  
2  
3  
4  
5  
6  
7  
8 SPIRIT 2013 Checklist: Recommended items to address in a clinical trial protocol and related  
9 documents\*

| Section/item                      | Item No | Description                                                                                                                                                                                                                                                                              | Addressed on page number |
|-----------------------------------|---------|------------------------------------------------------------------------------------------------------------------------------------------------------------------------------------------------------------------------------------------------------------------------------------------|--------------------------|
| <b>Administrative information</b> |         |                                                                                                                                                                                                                                                                                          |                          |
| Title                             | 1       | Descriptive title identifying the study design, population, interventions, and, if applicable, trial acronym                                                                                                                                                                             | 1                        |
| Trial registration                | 2a      | Trial identifier and registry name. If not yet registered, name of intended registry                                                                                                                                                                                                     | 3                        |
|                                   | 2b      | All items from the World Health Organization Trial Registration Data Set                                                                                                                                                                                                                 | -                        |
| Protocol version                  | 3       | Date and version identifier                                                                                                                                                                                                                                                              | 3                        |
| Funding                           | 4       | Sources and types of financial, material, and other support                                                                                                                                                                                                                              | 20                       |
| Roles and responsibilities        | 5a      | Names, affiliations, and roles of protocol contributors                                                                                                                                                                                                                                  | 1, 20                    |
|                                   | 5b      | Name and contact information for the trial sponsor                                                                                                                                                                                                                                       | 20                       |
|                                   | 5c      | Role of study sponsor and funders, if any, in study design; collection, management, analysis, and interpretation of data; writing of the report; and the decision to submit the report for publication, including whether they will have ultimate authority over any of these activities | 20                       |
|                                   | 5d      | Composition, roles, and responsibilities of the coordinating centre, steering committee, endpoint adjudication committee, data management team, and other individuals or groups overseeing the trial, if applicable (see Item 21a for data monitoring committee)                         | -                        |
| <b>Introduction</b>               |         |                                                                                                                                                                                                                                                                                          |                          |
| Background and rationale          | 6a      | Description of research question and justification for undertaking the trial, including summary of relevant studies (published and unpublished) examining benefits and harms for each intervention                                                                                       | 3 - 5                    |
|                                   | 6b      | Explanation for choice of comparators                                                                                                                                                                                                                                                    | 3 - 5                    |
| Objectives                        | 7       | Specific objectives or hypotheses                                                                                                                                                                                                                                                        | 6                        |
| Trial design                      | 8       | Description of trial design including type of trial (eg, parallel group, crossover, factorial, single group), allocation ratio, and framework (eg, superiority, equivalence, noninferiority, exploratory)                                                                                | 6                        |

1

2 **Methods: Participants, interventions, and outcomes**

3

|    |                      |     |                                                                                                                                                                                                                                                                                                                                                                                |                   |
|----|----------------------|-----|--------------------------------------------------------------------------------------------------------------------------------------------------------------------------------------------------------------------------------------------------------------------------------------------------------------------------------------------------------------------------------|-------------------|
| 4  | Study setting        | 9   | Description of study settings (eg, community clinic, academic hospital) and list of countries where data will be collected. Reference to where list of study sites can be obtained                                                                                                                                                                                             | 6                 |
| 5  |                      |     |                                                                                                                                                                                                                                                                                                                                                                                |                   |
| 6  |                      |     |                                                                                                                                                                                                                                                                                                                                                                                |                   |
| 7  |                      |     |                                                                                                                                                                                                                                                                                                                                                                                |                   |
| 8  | Eligibility criteria | 10  | Inclusion and exclusion criteria for participants. If applicable, eligibility criteria for study centres and individuals who will perform the interventions (eg, surgeons, psychotherapists)                                                                                                                                                                                   | 9, Table 1        |
| 9  |                      |     |                                                                                                                                                                                                                                                                                                                                                                                |                   |
| 10 |                      |     |                                                                                                                                                                                                                                                                                                                                                                                |                   |
| 11 |                      |     |                                                                                                                                                                                                                                                                                                                                                                                |                   |
| 12 |                      |     |                                                                                                                                                                                                                                                                                                                                                                                |                   |
| 13 | Interventions        | 11a | Interventions for each group with sufficient detail to allow replication, including how and when they will be administered                                                                                                                                                                                                                                                     | 10                |
| 14 |                      |     |                                                                                                                                                                                                                                                                                                                                                                                |                   |
| 15 |                      |     |                                                                                                                                                                                                                                                                                                                                                                                |                   |
| 16 |                      | 11b | Criteria for discontinuing or modifying allocated interventions for a given trial participant (eg, drug dose change in response to harms, participant request, or improving/worsening disease)                                                                                                                                                                                 | 10                |
| 17 |                      |     |                                                                                                                                                                                                                                                                                                                                                                                |                   |
| 18 |                      |     |                                                                                                                                                                                                                                                                                                                                                                                |                   |
| 19 |                      |     |                                                                                                                                                                                                                                                                                                                                                                                |                   |
| 20 |                      |     |                                                                                                                                                                                                                                                                                                                                                                                |                   |
| 21 |                      | 11c | Strategies to improve adherence to intervention protocols, and any procedures for monitoring adherence (eg, drug tablet return, laboratory tests)                                                                                                                                                                                                                              | 6 - 8             |
| 22 |                      |     |                                                                                                                                                                                                                                                                                                                                                                                |                   |
| 23 |                      |     |                                                                                                                                                                                                                                                                                                                                                                                |                   |
| 24 |                      |     |                                                                                                                                                                                                                                                                                                                                                                                |                   |
| 25 |                      | 11d | Relevant concomitant care and interventions that are permitted or prohibited during the trial                                                                                                                                                                                                                                                                                  | 9 - 10            |
| 26 |                      |     |                                                                                                                                                                                                                                                                                                                                                                                |                   |
| 27 |                      |     |                                                                                                                                                                                                                                                                                                                                                                                |                   |
| 28 | Outcomes             | 12  | Primary, secondary, and other outcomes, including the specific measurement variable (eg, systolic blood pressure), analysis metric (eg, change from baseline, final value, time to event), method of aggregation (eg, median, proportion), and time point for each outcome. Explanation of the clinical relevance of chosen efficacy and harm outcomes is strongly recommended | 11 - 12, Table 2  |
| 29 |                      |     |                                                                                                                                                                                                                                                                                                                                                                                |                   |
| 30 |                      |     |                                                                                                                                                                                                                                                                                                                                                                                |                   |
| 31 |                      |     |                                                                                                                                                                                                                                                                                                                                                                                |                   |
| 32 |                      |     |                                                                                                                                                                                                                                                                                                                                                                                |                   |
| 33 |                      |     |                                                                                                                                                                                                                                                                                                                                                                                |                   |
| 34 |                      |     |                                                                                                                                                                                                                                                                                                                                                                                |                   |
| 35 |                      |     |                                                                                                                                                                                                                                                                                                                                                                                |                   |
| 36 | Participant          | 13  | Time schedule of enrolment, interventions (including any run-ins and washouts), assessments, and visits for participants. A schematic diagram is highly recommended (see Figure)                                                                                                                                                                                               | 10 - 11, Figure 1 |
| 37 | timeline             |     |                                                                                                                                                                                                                                                                                                                                                                                |                   |
| 38 |                      |     |                                                                                                                                                                                                                                                                                                                                                                                |                   |
| 39 |                      |     |                                                                                                                                                                                                                                                                                                                                                                                |                   |
| 40 |                      |     |                                                                                                                                                                                                                                                                                                                                                                                |                   |
| 41 | Sample size          | 14  | Estimated number of participants needed to achieve study objectives and how it was determined, including clinical and statistical assumptions supporting any sample size calculations                                                                                                                                                                                          | 14-17             |
| 42 |                      |     |                                                                                                                                                                                                                                                                                                                                                                                |                   |
| 43 |                      |     |                                                                                                                                                                                                                                                                                                                                                                                |                   |
| 44 |                      |     |                                                                                                                                                                                                                                                                                                                                                                                |                   |
| 45 | Recruitment          | 15  | Strategies for achieving adequate participant enrolment to reach target sample size                                                                                                                                                                                                                                                                                            | 6-9               |
| 46 |                      |     |                                                                                                                                                                                                                                                                                                                                                                                |                   |
| 47 |                      |     |                                                                                                                                                                                                                                                                                                                                                                                |                   |

48 **Methods: Assignment of interventions (for controlled trials)**

49 Allocation:

|    |            |     |                                                                                                                                                                                                                                                                                                                                                          |   |
|----|------------|-----|----------------------------------------------------------------------------------------------------------------------------------------------------------------------------------------------------------------------------------------------------------------------------------------------------------------------------------------------------------|---|
| 50 |            |     |                                                                                                                                                                                                                                                                                                                                                          |   |
| 51 | Sequence   | 16a | Method of generating the allocation sequence (eg, computer-generated random numbers), and list of any factors for stratification. To reduce predictability of a random sequence, details of any planned restriction (eg, blocking) should be provided in a separate document that is unavailable to those who enrol participants or assign interventions | 9 |
| 52 | generation |     |                                                                                                                                                                                                                                                                                                                                                          |   |
| 53 |            |     |                                                                                                                                                                                                                                                                                                                                                          |   |
| 54 |            |     |                                                                                                                                                                                                                                                                                                                                                          |   |
| 55 |            |     |                                                                                                                                                                                                                                                                                                                                                          |   |
| 56 |            |     |                                                                                                                                                                                                                                                                                                                                                          |   |
| 57 |            |     |                                                                                                                                                                                                                                                                                                                                                          |   |
| 58 |            |     |                                                                                                                                                                                                                                                                                                                                                          |   |
| 59 |            |     |                                                                                                                                                                                                                                                                                                                                                          |   |
| 60 |            |     |                                                                                                                                                                                                                                                                                                                                                          |   |

|    |               |     |                                                                       |           |
|----|---------------|-----|-----------------------------------------------------------------------|-----------|
| 1  |               |     |                                                                       |           |
| 2  | Allocation    | 16b | Mechanism of implementing the allocation sequence (eg, central        | 9         |
| 3  | concealment   |     | telephone; sequentially numbered, opaque, sealed envelopes),          |           |
| 4  | mechanism     |     | describing any steps to conceal the sequence until interventions are  |           |
| 5  |               |     | assigned                                                              |           |
| 6  |               |     |                                                                       |           |
| 7  | Implementatio | 16c | Who will generate the allocation sequence, who will enrol             | 9         |
| 8  | n             |     | participants, and who will assign participants to interventions       |           |
| 9  |               |     |                                                                       |           |
| 10 |               |     |                                                                       |           |
| 11 | Blinding      | 17a | Who will be blinded after assignment to interventions (eg, trial      | 3, 9 - 10 |
| 12 | (masking)     |     | participants, care providers, outcome assessors, data analysts), and  |           |
| 13 |               |     | how                                                                   |           |
| 14 |               |     |                                                                       |           |
| 15 |               | 17b | If blinded, circumstances under which unblinding is permissible, and  | 3, 9 - 10 |
| 16 |               |     | procedure for revealing a participant's allocated intervention during |           |
| 17 |               |     | the trial                                                             |           |
| 18 |               |     |                                                                       |           |
| 19 |               |     |                                                                       |           |

## 20 **Methods: Data collection, management, and analysis**

|    |                 |     |                                                                         |         |
|----|-----------------|-----|-------------------------------------------------------------------------|---------|
| 21 |                 |     |                                                                         |         |
| 22 | Data collection | 18a | Plans for assessment and collection of outcome, baseline, and other     | 6 - 8   |
| 23 | methods         |     | trial data, including any related processes to promote data quality     |         |
| 24 |                 |     | (eg, duplicate measurements, training of assessors) and a               |         |
| 25 |                 |     | description of study instruments (eg, questionnaires, laboratory tests) |         |
| 26 |                 |     | along with their reliability and validity, if known. Reference to where |         |
| 27 |                 |     | data collection forms can be found, if not in the protocol              |         |
| 28 |                 |     |                                                                         |         |
| 29 |                 |     |                                                                         |         |
| 30 |                 | 18b | Plans to promote participant retention and complete follow-up,          | 6 - 12  |
| 31 |                 |     | including list of any outcome data to be collected for participants who |         |
| 32 |                 |     | discontinue or deviate from intervention protocols                      |         |
| 33 |                 |     |                                                                         |         |
| 34 | Data            | 19  | Plans for data entry, coding, security, and storage, including any      | 6 - 12  |
| 35 | management      |     | related processes to promote data quality (eg, double data entry;       |         |
| 36 |                 |     | range checks for data values). Reference to where details of data       |         |
| 37 |                 |     | management procedures can be found, if not in the protocol              |         |
| 38 |                 |     |                                                                         |         |
| 39 |                 |     |                                                                         |         |
| 40 | Statistical     | 20a | Statistical methods for analysing primary and secondary outcomes.       | 14 – 18 |
| 41 | methods         |     | Reference to where other details of the statistical analysis plan can   |         |
| 42 |                 |     | be found, if not in the protocol                                        |         |
| 43 |                 |     |                                                                         |         |
| 44 |                 | 20b | Methods for any additional analyses (eg, subgroup and adjusted          | 14 – 18 |
| 45 |                 |     | analyses)                                                               |         |
| 46 |                 |     |                                                                         |         |
| 47 |                 | 20c | Definition of analysis population relating to protocol non-adherence    | 14 - 18 |
| 48 |                 |     | (eg, as randomised analysis), and any statistical methods to handle     |         |
| 49 |                 |     | missing data (eg, multiple imputation)                                  |         |
| 50 |                 |     |                                                                         |         |
| 51 |                 |     |                                                                         |         |

## 52 **Methods: Monitoring**

|    |                 |     |                                                                         |    |
|----|-----------------|-----|-------------------------------------------------------------------------|----|
| 53 |                 |     |                                                                         |    |
| 54 | Data monitoring | 21a | Composition of data monitoring committee (DMC); summary of its          | 13 |
| 55 |                 |     | role and reporting structure; statement of whether it is independent    |    |
| 56 |                 |     | from the sponsor and competing interests; and reference to where        |    |
| 57 |                 |     | further details about its charter can be found, if not in the protocol. |    |
| 58 |                 |     | Alternatively, an explanation of why a DMC is not needed                |    |
| 59 |                 |     |                                                                         |    |
| 60 |                 |     |                                                                         |    |

|    |                                 |                                                                      |                                                                          |
|----|---------------------------------|----------------------------------------------------------------------|--------------------------------------------------------------------------|
| 1  |                                 |                                                                      |                                                                          |
| 2  | 21b                             | Description of any interim analyses and stopping guidelines,         | 13                                                                       |
| 3  |                                 | including who will have access to these interim results and make the |                                                                          |
| 4  |                                 | final decision to terminate the trial                                |                                                                          |
| 5  |                                 |                                                                      |                                                                          |
| 6  | Harms                           | 22                                                                   | Plans for collecting, assessing, reporting, and managing solicited and   |
| 7  |                                 |                                                                      | spontaneously reported adverse events and other unintended effects       |
| 8  |                                 |                                                                      | of trial interventions or trial conduct                                  |
| 9  |                                 |                                                                      |                                                                          |
| 10 |                                 |                                                                      |                                                                          |
| 11 | Auditing                        | 23                                                                   | Frequency and procedures for auditing trial conduct, if any, and         |
| 12 |                                 |                                                                      | whether the process will be independent from investigators and the       |
| 13 |                                 |                                                                      | sponsor                                                                  |
| 14 |                                 |                                                                      |                                                                          |
| 15 |                                 |                                                                      |                                                                          |
| 16 | <b>Ethics and dissemination</b> |                                                                      |                                                                          |
| 17 | Research ethics                 | 24                                                                   | Plans for seeking research ethics committee/institutional review         |
| 18 | approval                        |                                                                      | board (REC/IRB) approval                                                 |
| 19 |                                 |                                                                      |                                                                          |
| 20 | Protocol                        | 25                                                                   | Plans for communicating important protocol modifications (eg,            |
| 21 | amendments                      |                                                                      | changes to eligibility criteria, outcomes, analyses) to relevant parties |
| 22 |                                 |                                                                      | (eg, investigators, REC/IRBs, trial participants, trial registries,      |
| 23 |                                 |                                                                      | journals, regulators)                                                    |
| 24 |                                 |                                                                      |                                                                          |
| 25 |                                 |                                                                      |                                                                          |
| 26 | Consent or                      | 26a                                                                  | Who will obtain informed consent or assent from potential trial          |
| 27 | assent                          |                                                                      | participants or authorised surrogates, and how (see Item 32)             |
| 28 |                                 |                                                                      |                                                                          |
| 29 |                                 | 26b                                                                  | Additional consent provisions for collection and use of participant      |
| 30 |                                 |                                                                      | data and biological specimens in ancillary studies, if applicable        |
| 31 |                                 |                                                                      |                                                                          |
| 32 | Confidentiality                 | 27                                                                   | How personal information about potential and enrolled participants       |
| 33 |                                 |                                                                      | will be collected, shared, and maintained in order to protect            |
| 34 |                                 |                                                                      | confidentiality before, during, and after the trial                      |
| 35 |                                 |                                                                      |                                                                          |
| 36 |                                 |                                                                      |                                                                          |
| 37 | Declaration of                  | 28                                                                   | Financial and other competing interests for principal investigators for  |
| 38 | interests                       |                                                                      | the overall trial and each study site                                    |
| 39 |                                 |                                                                      |                                                                          |
| 40 | Access to data                  | 29                                                                   | Statement of who will have access to the final trial dataset, and        |
| 41 |                                 |                                                                      | disclosure of contractual agreements that limit such access for          |
| 42 |                                 |                                                                      | investigators                                                            |
| 43 |                                 |                                                                      |                                                                          |
| 44 |                                 |                                                                      |                                                                          |
| 45 | Ancillary and                   | 30                                                                   | Provisions, if any, for ancillary and post-trial care, and for           |
| 46 | post-trial care                 |                                                                      | compensation to those who suffer harm from trial participation           |
| 47 |                                 |                                                                      |                                                                          |
| 48 | Dissemination                   | 31a                                                                  | Plans for investigators and sponsor to communicate trial results to      |
| 49 | policy                          |                                                                      | participants, healthcare professionals, the public, and other relevant   |
| 50 |                                 |                                                                      | groups (eg, via publication, reporting in results databases, or other    |
| 51 |                                 |                                                                      | data sharing arrangements), including any publication restrictions       |
| 52 |                                 |                                                                      |                                                                          |
| 53 |                                 | 31b                                                                  | Authorship eligibility guidelines and any intended use of professional   |
| 54 |                                 |                                                                      | writers                                                                  |
| 55 |                                 |                                                                      |                                                                          |
| 56 |                                 |                                                                      |                                                                          |
| 57 |                                 | 31c                                                                  | Plans, if any, for granting public access to the full protocol,          |
| 58 |                                 |                                                                      | participant-level dataset, and statistical code                          |
| 59 |                                 |                                                                      |                                                                          |
| 60 |                                 |                                                                      |                                                                          |

1  
2 **Appendices**  
3

|                              |    |                                                                                                                                                                                                |                              |
|------------------------------|----|------------------------------------------------------------------------------------------------------------------------------------------------------------------------------------------------|------------------------------|
| 4 Informed consent materials | 32 | Model consent form and other related documentation given to participants and authorised surrogates                                                                                             | Appendix 1<br>(Consent form) |
| 7 Biological specimens       | 33 | Plans for collection, laboratory evaluation, and storage of biological specimens for genetic or molecular analysis in the current trial and for future use in ancillary studies, if applicable | 17 - 18                      |

11 It is strongly recommended that this checklist be read in conjunction with the SPIRIT 2013 Explanation  
12 & Elaboration for important clarification on the items. Amendments to the protocol should be tracked and  
13 dated. The SPIRIT checklist is copyrighted by the SPIRIT Group under the Creative Commons  
14 Attribution-NonCommercial-NoDerivs 3.0 Unported" license.  
15

16  
17  
18  
19  
20  
21  
22  
23  
24  
25  
26  
27  
28  
29  
30  
31  
32  
33  
34  
35  
36  
37  
38  
39  
40  
41  
42  
43  
44  
45  
46  
47  
48  
49  
50  
51  
52  
53  
54  
55  
56  
57  
58  
59  
60

For peer review only
